# Supplementary material for: DNA-damage induced cell death in yap1;wwtr1 mutant epidermal basal cells
Source: eLife. 2022 May 30;11:e72302. doi: 10.7554/eLife.72302 (PMC9197390; doi:10.7554/eLife.72302)
Supplement: Figure 1—source data 1. [file elife-72302-fig1-data1.xlsx]

## Sheet: 6-8ss_TUNEL_count
sample	yap1	wwtr1	tunel_total	tunel_p63
mut	mut	mut	53	4
mut	mut	mut	33	3
mut	mut	mut	15	3
sib	wt	het	0	0
sib	wt	het	0	0
sib	mut	wt	0	0
sib	het	mut	3	0
sib	wt	mut	0	0
