# Supplementary material for: DNA-damage induced cell death in yap1;wwtr1 mutant epidermal basal cells
Source: eLife. 2022 May 30;11:e72302. doi: 10.7554/eLife.72302 (PMC9197390; doi:10.7554/eLife.72302)
Supplement: Figure 2—figure supplement 1—source data 1. [file elife-72302-fig2-figsupp1-data1.xlsx]

## Sheet: Yap1
yap	p63.pos
-0.0572366	TRUE
0.162627	TRUE
-0.400104	FALSE
0.126124	TRUE
0.0936079	TRUE
0.142548	TRUE
0.0919949	TRUE
0.040886	TRUE
0.176002	TRUE
0.0633036	TRUE
-0.0728011	TRUE
-0.49154	FALSE
0.260549	TRUE
0.11846	TRUE
0.168456	TRUE
0.218327	TRUE
0.477621	TRUE
0.219959	TRUE
0.164178	TRUE
-0.0256029	TRUE
0.353814	TRUE
-0.318732	FALSE
-0.044334	TRUE
-0.0167236	TRUE
-0.0573494	TRUE
-0.187279	TRUE
-0.0518218	TRUE
-0.318719	TRUE
-0.165	TRUE
-0.0605282	TRUE
-0.314806	TRUE
-0.121578	TRUE
-0.213578	TRUE
-0.406126	TRUE
-0.242125	TRUE
-0.710853	FALSE
0.258042	TRUE
0.512456	TRUE
0.40278	TRUE
0.125309	TRUE
0.232501	TRUE
-0.300276	FALSE
0.214267	TRUE
0.175084	TRUE
0.138556	TRUE
0.602213	TRUE
0.113949	TRUE
0.0896016	TRUE
0.190606	TRUE
0.00772655	TRUE
-0.0704424	TRUE
0.0985919	TRUE
0.076501	TRUE
0.211038	TRUE
0.0638478	TRUE
0.00241318	TRUE
-0.0206434	TRUE
-0.493602	FALSE
-0.235764	FALSE

## Sheet: Wwtr1
Wwtr1	p63.pos
-0.508236	FALSE
0.540871	TRUE
0.142708	TRUE
0.396789	TRUE
0.106387	TRUE
0.516934	TRUE
-0.290356	TRUE
0.264448	TRUE
-0.393277	TRUE
-0.426306	FALSE
-0.529748	FALSE
0.278708	TRUE
0.321514	TRUE
0.253708	TRUE
0.479241	TRUE
-0.0728735	TRUE
0.351439	TRUE
0.0956743	TRUE
0.318675	TRUE
-0.381893	FALSE
-0.502872	TRUE
0.312308	TRUE
0.179612	TRUE
0.477462	TRUE
0.242886	TRUE
0.264385	TRUE
0.37401	TRUE
0.372769	TRUE
0.278469	TRUE
0.215343	TRUE
0.307625	TRUE
0.162664	TRUE
0.484104	TRUE
0.104904	TRUE
0.263582	TRUE
0.228438	TRUE
0.244399	TRUE
-0.326261	TRUE
0.154858	TRUE
0.302527	TRUE
0.0813464	TRUE
0.268137	TRUE
0.0442795	TRUE
-0.815385	FALSE
-0.479641	FALSE
0.589758	TRUE
0.134651	FALSE
0.44164	TRUE
0.356051	TRUE
0.143942	TRUE
-0.0260501	TRUE
0.108814	TRUE
0.379414	TRUE
0.596282	TRUE
-0.169423	FALSE
0.497273	TRUE
0.456248	TRUE
0.49026	TRUE
0.327164	TRUE
0.564864	TRUE
0.566453	TRUE
0.750385	TRUE
-0.0500925	FALSE
-0.343424	TRUE
0.667245	TRUE
0.935378	TRUE
0.65976	TRUE
-0.0900812	TRUE
-0.137333	FALSE
-0.136185	TRUE
0.00190734	TRUE
0.519078	TRUE
0.451476	TRUE
0.542789	TRUE
0.482816	TRUE
0.688971	TRUE
0.222635	TRUE
0.397351	TRUE
0.399144	TRUE
0.0679423	TRUE
0.429044	TRUE
0.383552	TRUE
0.212829	TRUE
0.305207	TRUE
0.348522	TRUE
0.395909	TRUE
-0.0470554	TRUE
-0.816948	FALSE
-0.627118	FALSE
0.18046	TRUE
-0.649676	FALSE
0.0562785	TRUE
-0.273488	TRUE
-0.623652	FALSE
0.0783657	TRUE
-0.547802	FALSE
-0.0689971	TRUE
0.045107	TRUE
-0.648384	FALSE
0.416013	TRUE
0.494622	TRUE
-0.187294	TRUE
0.45361	TRUE
0.413851	TRUE
0.417449	TRUE
0.216559	TRUE
-0.389608	FALSE
0.410159	TRUE
0.265528	TRUE
0.32585	TRUE
0.419505	TRUE
0.491902	TRUE
0.216222	TRUE
-0.546008	FALSE
-0.423053	FALSE
-0.16997	TRUE
-0.590659	TRUE
-0.575321	FALSE
0.254774	TRUE
-0.0224588	TRUE
-0.308766	TRUE
0.321194	TRUE
0.176276	TRUE
0.224809	TRUE
0.448742	TRUE
0.233906	TRUE
0.294972	TRUE
0.231041	TRUE
0.368083	TRUE
-0.54159	TRUE
-0.267619	TRUE
