# Supplementary material for: DNA-damage induced cell death in yap1;wwtr1 mutant epidermal basal cells
Source: eLife. 2022 May 30;11:e72302. doi: 10.7554/eLife.72302 (PMC9197390; doi:10.7554/eLife.72302)
Supplement: Figure 3—source data 1. [file elife-72302-fig3-data1.xlsx]

## Sheet: Figure2B
ph3	gtype
53	mut
58	mut
61	mut
57	mut
57	mut
52	mut
49	WT
48	WT
41	WT
65	WT
52	WT
75	WT
44	WT
46	WT
