# Supplementary material for: DNA-damage induced cell death in yap1;wwtr1 mutant epidermal basal cells
Source: eLife. 2022 May 30;11:e72302. doi: 10.7554/eLife.72302 (PMC9197390; doi:10.7554/eLife.72302)
Supplement: Figure 4—source data 1. [file elife-72302-fig4-data1.xlsx]

## Sheet: Figure4A
sample	casp3_total	name	value
mut	20	casp3_p63	8
mut	20	casp3_frag	12
mut	5	casp3_p63	2
mut	5	casp3_frag	3
wt	0	casp3_p63	0
wt	0	casp3_frag	0
wt	0	casp3_p63	0
wt	0	casp3_frag	0
wt	0	casp3_p63	0
wt	0	casp3_frag	0
wt	0	casp3_p63	0
wt	0	casp3_frag	0
mut	17	casp3_p63	1
mut	17	casp3_frag	16
mut	25	casp3_p63	1
mut	25	casp3_frag	24
mut	21	casp3_p63	0
mut	21	casp3_frag	21
mut	21	casp3_p63	0
mut	21	casp3_frag	21
mut	17	casp3_p63	0
mut	17	casp3_frag	17
mut	10	casp3_p63	1
mut	10	casp3_frag	9
mut	13	casp3_p63	0
mut	13	casp3_frag	13
wt	0	casp3_p63	0
wt	0	casp3_frag	0
wt	0	casp3_p63	0
wt	0	casp3_frag	0
wt	0	casp3_p63	0
wt	0	casp3_frag	0

## Sheet: Figure4B
sample	casp8_total
mut	21
mut	34
mut	19
mut	29
wt	0
wt	0
mut	30
mut	9
mut	12
mut	10
wt	0
wt	0
wt	0
wt	0

## Sheet: Figure4C
sample	h2ax_total	name	value
mut	12	h2ax_p63	1
mut	12	h2ax_frag	11
mut	7	h2ax_p63	1
mut	7	h2ax_frag	6
mut	8	h2ax_p63	1
mut	8	h2ax_frag	7
mut	8	h2ax_p63	1
mut	8	h2ax_frag	7
wt	0	h2ax_p63	0
wt	0	h2ax_frag	0
wt	1	h2ax_p63	0
wt	1	h2ax_frag	1
wt	0	h2ax_p63	0
wt	0	h2ax_frag	0
wt	0	h2ax_p63	0
wt	0	h2ax_frag	0
wt	0	h2ax_p63	0
wt	0	h2ax_frag	0
mut	10	h2ax_p63	0
mut	10	h2ax_frag	10
mut	11	h2ax_p63	1
mut	11	h2ax_frag	10
mut	7	h2ax_p63	4
mut	7	h2ax_frag	3
mut	12	h2ax_p63	3
mut	12	h2ax_frag	9
wt	0	h2ax_p63	0
wt	0	h2ax_frag	0
wt	0	h2ax_p63	0
wt	0	h2ax_frag	0
wt	1	h2ax_p63	0
wt	1	h2ax_frag	1
wt	1	h2ax_p63	1
wt	1	h2ax_frag	0
wt	2	h2ax_p63	0
wt	2	h2ax_frag	2
