# Supplementary material for: DNA-damage induced cell death in yap1;wwtr1 mutant epidermal basal cells
Source: eLife. 2022 May 30;11:e72302. doi: 10.7554/eLife.72302 (PMC9197390; doi:10.7554/eLife.72302)
Supplement: Figure 5—source data 1. [file elife-72302-fig5-data1.xlsx]

## Sheet: Figure5
Area	AR	Round	cell	embryo	gtype	Frame
419.106	1.45805	0.68585	1	1	mutant	106
440.382	1.49545	0.668693	1	1	mutant	100
459.609	1.5372	0.650535	1	1	mutant	95
550.858	1.48813	0.671984	1	1	mutant	90
540.247	1.71452	0.583255	1	1	mutant	85
489.343	1.5679	0.637796	1	1	mutant	80
458.086	1.09878	0.910096	1	1	mutant	75
472.217	1.67437	0.597239	1	1	mutant	70
536.99	1.29366	0.772999	1	1	mutant	65
453.2	1.63412	0.61195	1	1	mutant	60
502.476	1.36254	0.733922	1	1	mutant	55
453.673	1.43834	0.695246	1	1	mutant	50
506.468	1.62094	0.616925	1	1	mutant	45
402.348	1.66766	0.599642	1	1	mutant	40
411.857	1.50014	0.666605	1	1	mutant	35
411.174	1.09295	0.914959	1	1	mutant	30
383.542	1.32033	0.757386	1	1	mutant	25
332.165	1.39095	0.718931	1	1	mutant	20
344.457	1.39201	0.718384	1	1	mutant	15
378.866	1.44414	0.692452	1	1	mutant	10
334.161	1.31291	0.761668	1	1	mutant	5
240.758	1.0862	0.920644	1	1	mutant	1
480.78	1.80655	0.55354	2	1	mutant	105
494.333	1.45695	0.686365	2	1	mutant	100
488.082	1.5226	0.656773	2	1	mutant	95
457.298	1.37045	0.729688	2	1	mutant	90
457.298	1.85044	0.540413	2	1	mutant	85
427.406	2.09008	0.47845	2	1	mutant	80
440.907	1.85112	0.540215	2	1	mutant	75
470.221	1.6483	0.606686	2	1	mutant	70
431.031	1.55606	0.642649	2	1	mutant	65
449.26	2.0045	0.498879	2	1	mutant	60
387.482	1.82022	0.549385	2	1	mutant	55
445.057	1.30723	0.764979	2	1	mutant	50
431.031	2.29905	0.434962	2	1	mutant	45
308.21	1.55122	0.644655	2	1	mutant	40
317.298	1.52167	0.657172	2	1	mutant	35
242.701	1.61028	0.621009	2	1	mutant	30
261.403	1.36203	0.734199	2	1	mutant	25
273.328	1.47065	0.67997	2	1	mutant	20
537.568	1.38106	0.724081	3	1	mutant	118
522.753	1.20346	0.830935	3	1	mutant	113
512.247	1.14606	0.872555	3	1	mutant	108
507.887	1.44011	0.694392	3	1	mutant	103
515.084	1.20959	0.826723	3	1	mutant	98
459.609	1.30302	0.767447	3	1	mutant	93
440.54	1.40996	0.709242	3	1	mutant	88
431.557	1.91958	0.520948	3	1	mutant	83
476.42	1.88207	0.531329	3	1	mutant	78
430.979	1.35328	0.738944	3	1	mutant	73
510.146	1.25001	0.799997	3	1	mutant	68
444.637	1.59557	0.626736	3	1	mutant	63
440.96	1.71137	0.584328	3	1	mutant	58
425.778	1.90195	0.525777	3	1	mutant	53
409.178	1.62165	0.616657	3	1	mutant	48
344.667	1.10634	0.903881	3	1	mutant	43
353.756	1.45548	0.68706	3	1	mutant	38
356.12	1.61244	0.620178	3	1	mutant	33
323.759	1.57198	0.636139	3	1	mutant	28
288.983	2.02275	0.494376	3	1	mutant	23
310.679	1.89923	0.526529	3	1	mutant	18
299.174	1.47487	0.678027	3	1	mutant	13
270.018	1.3936	0.717567	3	1	mutant	8
286.251	1.53285	0.652382	3	1	mutant	3
208.923	1.47952	0.675895	3	1	mutant	1
587.789	1.26974	0.787561	4	1	mutant	118
436.915	1.14584	0.872722	4	1	mutant	113
455.722	1.35489	0.738067	4	1	mutant	108
464.127	1.84477	0.542072	4	1	mutant	103
442.431	1.49654	0.668209	4	1	mutant	98
427.827	1.31477	0.760591	4	1	mutant	93
414.536	1.7877	0.559378	4	1	mutant	88
432.87	1.50101	0.666218	4	1	mutant	83
397.936	1.53269	0.65245	4	1	mutant	78
523.857	2.3355	0.428173	4	1	mutant	73
477.996	1.79387	0.557455	4	1	mutant	68
456.405	1.97079	0.507411	4	1	mutant	63
476.577	1.7233	0.580282	4	1	mutant	58
437.073	1.33949	0.746551	4	1	mutant	53
424.097	1.77972	0.561887	4	1	mutant	48
433.658	1.54377	0.647766	4	1	mutant	43
385.485	1.33164	0.750955	4	1	mutant	38
391.684	1.5438	0.647753	4	1	mutant	33
240.232	1.5449	0.647291	4	1	mutant	28
289.718	1.62225	0.616427	4	1	mutant	23
281.103	1.84563	0.541819	4	1	mutant	18
293.5	1.18147	0.8464	4	1	mutant	13
301.538	1.23809	0.807696	4	1	mutant	8
532.892	1.09274	0.91513	5	1	mutant	144
596.457	1.26836	0.788421	5	1	mutant	139
503.474	1.25317	0.797977	5	1	mutant	134
496.907	1.74801	0.572081	5	1	mutant	129
463.076	1.3547	0.738171	5	1	mutant	124
536.149	1.42621	0.701158	5	1	mutant	119
537.515	1.81968	0.549547	5	1	mutant	114
477.313	1.87222	0.534124	5	1	mutant	109
479.992	1.74077	0.574458	5	1	mutant	104
503.054	1.81614	0.550618	5	1	mutant	99
510.251	1.31525	0.760312	5	1	mutant	94
434.498	1.4712	0.679719	5	1	mutant	89
482.566	1.50454	0.664654	5	1	mutant	84
576.652	2.05607	0.486365	5	1	mutant	79
504.63	2.33007	0.429172	5	1	mutant	74
446.476	1.53785	0.650258	5	1	mutant	69
496.487	1.57804	0.633698	5	1	mutant	64
485.14	1.2709	0.786842	5	1	mutant	59
462.866	1.13156	0.883733	5	1	mutant	54
448.525	1.32204	0.756408	5	1	mutant	49
462.814	1.44596	0.691584	5	1	mutant	44
438.438	1.3534	0.738881	5	1	mutant	39
391.001	1.27146	0.786496	5	1	mutant	34
323.864	1.43076	0.698928	5	1	mutant	29
328.33	1.18962	0.840608	5	1	mutant	24
273.591	1.84124	0.543111	5	1	mutant	19
252.998	2.17018	0.460791	5	1	mutant	14
237.973	1.38671	0.721134	5	1	mutant	9
532.84	1.22391	0.817051	6	1	mutant	151
420.84	1.71502	0.583083	6	1	mutant	146
380.862	1.96057	0.510056	6	1	mutant	141
418.476	1.56001	0.641022	6	1	mutant	136
501.583	1.27315	0.785454	6	1	mutant	131
454.934	1.53904	0.649757	6	1	mutant	126
487.924	1.18026	0.847274	6	1	mutant	121
480.57	1.13878	0.878132	6	1	mutant	116
533.89	1.19733	0.83519	6	1	mutant	111
476.63	1.63184	0.612805	6	1	mutant	106
512.772	1.3695	0.730193	6	1	mutant	101
443.429	1.18651	0.842806	6	1	mutant	96
537.042	1.42367	0.702408	6	1	mutant	91
598.978	1.38264	0.723255	6	1	mutant	86
570.348	1.8024	0.554815	6	1	mutant	81
517.763	1.27391	0.784982	6	1	mutant	76
517.132	1.43924	0.694813	6	1	mutant	71
592.569	1.60219	0.624144	6	1	mutant	66
517.08	1.77297	0.564026	6	1	mutant	61
569.087	1.33534	0.748871	6	1	mutant	56
459.399	1.49881	0.667195	6	1	mutant	51
477.418	1.54837	0.645842	6	1	mutant	46
450.311	1.30125	0.768492	6	1	mutant	41
446.528	1.40895	0.709747	6	1	mutant	36
398.881	1.15422	0.866386	6	1	mutant	31
408.232	1.14581	0.872747	6	1	mutant	26
378.866	1.4994	0.666935	6	1	mutant	21
383.384	1.22786	0.814425	6	1	mutant	16
326.071	1.44907	0.690098	6	1	mutant	11
315.827	1.13605	0.880242	6	1	mutant	6
213.336	1.34115	0.745628	6	1	mutant	1
481.62	1.19986	0.833434	7	1	mutant	148
492.967	1.04194	0.959745	7	1	mutant	143
566.356	1.23464	0.809951	7	1	mutant	138
491.496	1.64439	0.608128	7	1	mutant	133
435.181	1.72489	0.579746	7	1	mutant	128
483.879	1.23958	0.806724	7	1	mutant	123
557.793	1.35341	0.738874	7	1	mutant	118
476.262	1.54954	0.645352	7	1	mutant	113
440.119	1.13693	0.879565	7	1	mutant	108
486.611	1.56558	0.638743	7	1	mutant	103
470.799	1.69142	0.591218	7	1	mutant	98
541.77	1.45914	0.685333	7	1	mutant	93
475.894	1.5738	0.635406	7	1	mutant	88
443.744	1.21923	0.820188	7	1	mutant	83
452.622	1.36563	0.732261	7	1	mutant	78
506.573	1.33925	0.746684	7	1	mutant	73
532.104	1.40332	0.712596	7	1	mutant	68
517.343	1.70658	0.585969	7	1	mutant	63
454.618	1.39134	0.718731	7	1	mutant	58
449.891	1.14571	0.872824	7	1	mutant	53
460.239	1.23539	0.809462	7	1	mutant	48
462.236	1.18427	0.844405	7	1	mutant	43
441.853	1.13934	0.877703	7	1	mutant	38
429.665	1.53087	0.653224	7	1	mutant	33
347.977	2.06384	0.484533	7	1	mutant	28
311.362	2.06084	0.48524	7	1	mutant	23
320.923	2.16072	0.462809	7	1	mutant	18
344.51	2.17243	0.460314	7	1	mutant	13
252.052	1.3865	0.72124	7	1	mutant	8
211.602	1.08771	0.919359	7	1	mutant	3
191.745	1.14599	0.872607	7	1	mutant	1
475.421	1.42991	0.699346	8	1	mutant	150
513.718	1.26068	0.793221	8	1	mutant	145
473.688	1.06392	0.939916	8	1	mutant	140
458.716	1.35483	0.7381	8	1	mutant	135
456.194	1.58036	0.632766	8	1	mutant	130
474.581	1.29208	0.773945	8	1	mutant	125
493.703	1.47714	0.676982	8	1	mutant	120
467.226	1.67984	0.595295	8	1	mutant	115
523.962	1.54456	0.647434	8	1	mutant	110
595.984	2.24561	0.445312	8	1	mutant	105
527.849	1.69727	0.58918	8	1	mutant	100
520.6	1.3344	0.749399	8	1	mutant	95
493.545	1.58215	0.632051	8	1	mutant	90
500.742	1.183	0.845309	8	1	mutant	85
475.316	1.27588	0.783772	8	1	mutant	80
497.38	1.68874	0.592156	8	1	mutant	75
593.252	1.32146	0.756741	8	1	mutant	70
559.421	1.09849	0.910337	8	1	mutant	65
528.007	1.12297	0.890492	8	1	mutant	60
534.206	1.20788	0.827894	8	1	mutant	55
516.87	1.14816	0.870958	8	1	mutant	50
479.361	1.82136	0.549041	8	1	mutant	45
475.211	1.8297	0.546537	8	1	mutant	40
452.78	1.32409	0.755236	8	1	mutant	35
405.29	1.75755	0.568973	8	1	mutant	30
362.739	2.077	0.481464	8	1	mutant	25
360.217	2.05252	0.487206	8	1	mutant	20
285.358	2.0167	0.49586	8	1	mutant	15
267.392	1.86267	0.536865	8	1	mutant	10
207.715	1.4192	0.704622	8	1	mutant	5
217.853	1.18309	0.845243	8	1	mutant	1
490.761	1.62115	0.616848	9	1	mutant	160
424.149	2.26315	0.441862	9	1	mutant	155
410.491	2.53472	0.39452	9	1	mutant	150
423.309	1.89054	0.528949	9	1	mutant	145
488.607	1.82781	0.547104	9	1	mutant	140
506.311	1.61313	0.619913	9	1	mutant	135
481.883	1.71655	0.582564	9	1	mutant	130
434.603	2.01869	0.495371	9	1	mutant	125
583.691	1.29113	0.774513	9	1	mutant	120
559.842	1.2636	0.791387	9	1	mutant	115
547.864	1.6222	0.616447	9	1	mutant	110
609.17	1.16767	0.856404	9	1	mutant	105
567.091	1.26805	0.78861	9	1	mutant	100
515.451	1.13515	0.880938	9	1	mutant	95
571.924	1.15217	0.867928	9	1	mutant	90
511.039	1.38392	0.722584	9	1	mutant	85
553.485	1.07588	0.929474	9	1	mutant	80
554.01	1.32549	0.75444	9	1	mutant	75
566.198	1.5369	0.650659	9	1	mutant	70
502.213	1.25939	0.794035	9	1	mutant	65
540.142	1.27697	0.783105	9	1	mutant	60
518.393	1.58631	0.630394	9	1	mutant	55
465.545	1.48109	0.67518	9	1	mutant	50
466.964	1.21131	0.82555	9	1	mutant	45
466.859	1.71976	0.581476	9	1	mutant	40
379.864	1.46305	0.683501	9	1	mutant	35
433.658	1.68631	0.593011	9	1	mutant	30
394.048	1.20948	0.826799	9	1	mutant	25
460.555	1.40208	0.713225	9	1	mutant	20
314.829	1.54565	0.646977	9	1	mutant	15
300.96	1.6437	0.608384	9	1	mutant	10
232.983	1.26046	0.793362	9	1	mutant	5
232.615	1.40094	0.713805	9	1	mutant	1
852.344	1.38444	0.722314	1	2	sib	161
810.738	1.59577	0.626658	1	2	sib	156
717.597	1.36214	0.734137	1	2	sib	151
852.764	1.69065	0.591488	1	2	sib	146
804.119	1.31051	0.763061	1	2	sib	141
819.774	1.36999	0.729931	1	2	sib	136
781.53	1.78226	0.561085	1	2	sib	131
809.057	1.59181	0.628214	1	2	sib	126
837.53	1.08811	0.919021	1	2	sib	121
599.766	1.97441	0.50648	1	2	sib	116
783.316	1.70783	0.585539	1	2	sib	111
665.958	1.14723	0.871665	1	2	sib	106
600.817	1.73493	0.576392	1	2	sib	101
633.072	1.6826	0.59432	1	2	sib	96
590.993	1.33482	0.749166	1	2	sib	91
517.605	1.27346	0.785262	1	2	sib	86
562.941	1.15126	0.868615	1	2	sib	81
559.947	1.75953	0.568334	1	2	sib	76
512.825	1.6405	0.60957	1	2	sib	71
495.331	1.39638	0.716137	1	2	sib	66
522.228	1.24791	0.801341	1	2	sib	61
429.035	1.68644	0.592966	1	2	sib	56
417.635	1.25759	0.795172	1	2	sib	51
413.013	1.54234	0.648366	1	2	sib	46
411.752	1.20012	0.83325	1	2	sib	41
358.273	1.28939	0.775559	1	2	sib	36
332.637	1.32099	0.757009	1	2	sib	31
288.457	1.35453	0.738263	1	2	sib	29
204.72	1.5661	0.63853	2	2	sib	1
257.568	1.71216	0.584059	2	2	sib	6
293.448	2.17303	0.460186	2	2	sib	11
322.604	1.60514	0.622999	2	2	sib	16
370.514	1.125	0.888891	2	2	sib	21
339.046	1.38422	0.722431	2	2	sib	26
353.178	1.45431	0.687611	2	2	sib	31
475.894	1.89618	0.527375	2	2	sib	36
509.988	1.44283	0.69308	2	2	sib	41
574.656	2.52241	0.396446	2	2	sib	46
504.104	2.06836	0.483476	2	2	sib	51
540.982	2.08066	0.480618	2	2	sib	51
526.956	1.53254	0.652512	2	2	sib	56
608.907	1.67988	0.59528	2	2	sib	61
628.502	1.56909	0.637311	2	2	sib	66
752.584	1.40041	0.714079	2	2	sib	71
629.973	1.82528	0.547861	2	2	sib	76
732.149	1.29187	0.774071	2	2	sib	81
722.273	1.77255	0.56416	2	2	sib	86
661.02	1.57863	0.633461	2	2	sib	91
651.669	2.89453	0.345479	2	2	sib	96
583.376	2.69678	0.370813	2	2	sib	101
767.661	1.37241	0.728643	2	2	sib	106
770.498	1.11179	0.899449	2	2	sib	111
730.153	1.24712	0.801847	2	2	sib	116
758.1	1.35871	0.735991	2	2	sib	121
853.027	1.58855	0.629506	2	2	sib	126
753.11	1.03508	0.966108	2	2	sib	131
999.331	1.1662	0.857486	2	2	sib	136
831.436	1.06542	0.938593	2	2	sib	141
732.307	1.20785	0.827915	2	2	sib	146
948.531	1.92634	0.51912	2	2	sib	151
871.466	1.18476	0.844056	2	2	sib	156
1003.27	1.12832	0.88627	2	2	sib	161
272.225	1.64966	0.606186	3	2	sib	1
378.814	1.48904	0.671574	3	2	sib	6
362.844	1.50153	0.665987	3	2	sib	11
416.427	1.96555	0.508763	3	2	sib	16
407.864	1.72971	0.578132	3	2	sib	21
459.714	1.51307	0.66091	3	2	sib	26
496.75	1.22173	0.818513	3	2	sib	31
524.434	1.18616	0.843055	3	2	sib	36
623.196	1.19919	0.833896	3	2	sib	41
590.678	1.79168	0.558134	3	2	sib	46
585.95	1.74696	0.572424	3	2	sib	51
576.232	2.23536	0.447355	3	2	sib	56
774.911	1.21247	0.824764	3	2	sib	61
629.08	1.22708	0.814941	3	2	sib	66
397.988	1.3875	0.72072	3	2	sib	71
820.614	1.16371	0.85932	4	2	sib	161
778.956	1.48214	0.674698	4	2	sib	156
766.295	1.49526	0.668778	4	2	sib	151
596.509	1.49372	0.66947	4	2	sib	146
754.318	1.69603	0.589613	4	2	sib	141
623.616	1.50665	0.663722	4	2	sib	136
651.511	1.40519	0.711647	4	2	sib	131
641.53	1.10099	0.908277	4	2	sib	126
638.431	1.81088	0.552219	4	2	sib	121
599.451	1.10838	0.902214	4	2	sib	116
571.451	1.2635	0.791451	4	2	sib	111
462.971	1.73467	0.576479	4	2	sib	106
475.526	1.31768	0.758911	4	2	sib	101
471.849	1.92681	0.518992	4	2	sib	96
488.292	1.1716	0.853535	4	2	sib	91
453.358	1.86162	0.537168	4	2	sib	86
526.588	1.1857	0.843386	4	2	sib	81
413.065	1.20947	0.826807	4	2	sib	76
402.138	1.30199	0.768055	4	2	sib	71
388.165	1.88748	0.529806	4	2	sib	66
391.789	1.16726	0.856707	4	2	sib	61
331.954	1.86819	0.535278	4	2	sib	56
386.641	1.44509	0.691999	4	2	sib	51
323.076	1.32449	0.755005	4	2	sib	46
252.84	1.20173	0.832136	4	2	sib	43
938.708	1.22379	0.817134	5	2	sib	161
794.821	1.40498	0.711756	5	2	sib	156
754.265	1.48395	0.673878	5	2	sib	151
829.965	1.59304	0.62773	5	2	sib	146
806.273	1.27743	0.782822	5	2	sib	141
864.426	1.45111	0.689126	5	2	sib	136
695.166	1.60283	0.623898	5	2	sib	131
797.29	1.61964	0.617419	5	2	sib	126
728.787	1.2297	0.813208	5	2	sib	121
513.245	1.94527	0.514068	5	2	sib	116
602.708	1.621	0.616904	5	2	sib	111
634.963	1.12776	0.886711	5	2	sib	106
672.577	1.57775	0.633813	5	2	sib	101
639.166	1.76698	0.565938	5	2	sib	96
601.237	1.43495	0.696888	5	2	sib	91
486.086	1.28657	0.77726	5	2	sib	86
623.879	1.17929	0.847969	5	2	sib	81
492.127	1.45852	0.685625	5	2	sib	76
517.08	1.70177	0.587623	5	2	sib	71
467.647	1.32042	0.757333	5	2	sib	66
536.307	1.28168	0.780228	5	2	sib	61
358.326	1.35698	0.736932	5	2	sib	56
403.767	1.26968	0.787603	5	2	sib	51
378.971	1.61106	0.620708	5	2	sib	46
381.02	1.21184	0.825192	5	2	sib	41
343.564	1.32392	0.75533	5	2	sib	36
319.662	1.38859	0.720155	5	2	sib	31
301.065	1.16096	0.861358	5	2	sib	29
908.712	1.20228	0.831755	6	2	sib	161
841.102	1.4427	0.693143	6	2	sib	156
739.451	1.1553	0.865577	6	2	sib	151
645.365	1.37966	0.724816	6	2	sib	146
558.791	2.39655	0.417267	6	2	sib	141
585.74	1.47705	0.677026	6	2	sib	136
731.151	1.54065	0.649076	6	2	sib	131
629.553	1.19586	0.836218	6	2	sib	126
486.401	1.11256	0.89883	6	2	sib	121
652.142	1.07244	0.932449	6	2	sib	116
527.009	1.64647	0.607359	6	2	sib	111
535.361	1.75571	0.569569	6	2	sib	106
544.029	1.35644	0.737226	6	2	sib	101
561.628	2.78899	0.358552	6	2	sib	96
484.825	1.11086	0.900206	6	2	sib	91
516.029	1.70714	0.585774	6	2	sib	86
479.151	1.19307	0.838176	6	2	sib	81
449.943	1.18732	0.842232	6	2	sib	76
426.724	1.45963	0.685105	6	2	sib	71
408.18	1.70989	0.584833	6	2	sib	66
416.952	1.06861	0.935798	6	2	sib	61
407.392	1.67588	0.596701	6	2	sib	56
393.996	1.47195	0.679369	6	2	sib	51
369.305	1.36934	0.73028	6	2	sib	46
182.079	1.15251	0.86767	6	2	sib	42
932.141	1.21808	0.820965	7	2	sib	157
957.62	1.89333	0.528169	7	2	sib	153
938.708	1.65103	0.605684	7	2	sib	147
982.415	1.72749	0.578875	7	2	sib	146
891.954	1.39461	0.717046	7	2	sib	141
875.879	1.86322	0.536706	7	2	sib	136
888.644	1.48023	0.67557	7	2	sib	131
847.406	1.24662	0.802171	7	2	sib	126
840.682	1.72874	0.578455	7	2	sib	121
754.16	1.71024	0.584712	7	2	sib	116
696.584	1.34637	0.742738	7	2	sib	111
749.275	2.20156	0.454223	7	2	sib	106
745.808	1.28085	0.780729	7	2	sib	101
788.622	1.50729	0.663444	7	2	sib	96
883.969	1.47976	0.675783	7	2	sib	91
737.455	1.94343	0.514555	7	2	sib	86
750.01	1.28133	0.780439	7	2	sib	81
800.547	1.77014	0.564927	7	2	sib	76
608.434	1.44373	0.692652	7	2	sib	71
695.481	1.30057	0.768895	7	2	sib	66
497.853	1.15021	0.869403	7	2	sib	61
614.896	1.67929	0.595488	7	2	sib	56
643.736	1.96588	0.508677	7	2	sib	51
482.776	1.43664	0.696067	7	2	sib	46
395.834	2.02673	0.493405	7	2	sib	41
421.208	1.84062	0.543296	7	2	sib	36
355.069	1.75904	0.568493	7	2	sib	31
416.217	1.68834	0.592299	7	2	sib	26
401.981	1.40498	0.711756	7	2	sib	21
318.821	2.08857	0.478796	7	2	sib	16
244.277	1.74443	0.573253	7	2	sib	11
265.238	1.83778	0.544135	7	2	sib	6
290.033	1.52516	0.655668	7	2	sib	1
883.286	1.11986	0.892966	8	2	sib	153
813.207	1.28957	0.775455	8	2	sib	148
733.935	1.84513	0.541968	8	2	sib	143
811.579	1.80669	0.553498	8	2	sib	138
812.209	2.02915	0.492818	8	2	sib	133
521.545	1.83452	0.545103	8	2	sib	126
653.56	1.52734	0.654733	8	2	sib	121
455.617	1.87038	0.53465	8	2	sib	116
577.703	1.16025	0.861886	8	2	sib	111
664.539	2.04485	0.489033	8	2	sib	106
676.622	1.4357	0.696523	8	2	sib	101
552.592	1.58449	0.631117	8	2	sib	96
672.892	1.63344	0.612203	8	2	sib	91
729.155	1.19478	0.836972	8	2	sib	86
644.209	1.58817	0.629654	8	2	sib	81
550.491	2.68756	0.372085	8	2	sib	76
506.626	3.0671	0.326041	8	2	sib	71
592.149	1.18734	0.842217	8	2	sib	66
543.977	1.19769	0.834942	8	2	sib	61
496.907	1.24266	0.804727	8	2	sib	56
441.59	1.72853	0.578526	8	2	sib	51
351.864	1.67285	0.597782	8	2	sib	46
284.255	1.94225	0.514867	8	2	sib	41
386.483	1.38048	0.724386	8	2	sib	36
367.729	1.72915	0.578319	8	2	sib	31
323.234	1.63843	0.610342	8	2	sib	26
270.176	1.9224	0.520184	8	2	sib	21
258.409	1.68555	0.593276	8	2	sib	16
217.486	1.45947	0.685178	8	2	sib	11
241.335	1.83075	0.546224	8	2	sib	6
140.157	1.9368	0.516316	8	2	sib	1
852.922	1.14327	0.87468	9	2	sib	161
861.957	1.92267	0.520109	9	2	sib	156
978.79	1.26937	0.787792	9	2	sib	151
733.567	1.19565	0.836368	9	2	sib	146
848.772	1.31196	0.762217	9	2	sib	141
589.89	1.31713	0.759227	9	2	sib	136
788.464	1.16108	0.86127	9	2	sib	131
634.28	1.47844	0.676389	9	2	sib	125
776.014	1.18077	0.846903	9	2	sib	120
818.355	1.12869	0.885987	9	2	sib	115
545.92	2.65844	0.376161	9	2	sib	110
526.851	1.41819	0.705126	9	2	sib	106
673.207	1.09742	0.911227	9	2	sib	102
536.622	1.76742	0.565797	9	2	sib	96
782.108	1.06435	0.939539	9	2	sib	91
648.832	1.66081	0.602114	9	2	sib	86
666.01	1.46524	0.68248	9	2	sib	81
516.922	1.13008	0.884891	9	2	sib	76
586.371	1.21791	0.821082	9	2	sib	71
586.371	1.21791	0.821082	9	2	sib	71
561.155	1.13563	0.88057	9	2	sib	66
508.412	1.26718	0.789152	9	2	sib	61
423.256	1.55677	0.642355	9	2	sib	56
445.53	1.80129	0.555158	9	2	sib	51
357.906	1.42234	0.703069	9	2	sib	46
363.947	1.8934	0.52815	9	2	sib	41
361.583	1.47763	0.67676	9	2	sib	36
335.264	1.95192	0.512316	9	2	sib	31
281.103	1.91655	0.521771	9	2	sib	26
295.234	1.40306	0.712726	9	2	sib	21
314.881	1.14345	0.874543	9	2	sib	16
217.696	1.15899	0.862822	9	2	sib	13
657.763	1.31539	0.760232	1	3	mutant	95
541.297	1.66336	0.601194	1	3	mutant	90
576.442	1.77321	0.563948	1	3	mutant	87
458.086	1.34711	0.742331	1	3	mutant	85
462.446	1.4648	0.682687	1	3	mutant	81
515.399	1.26651	0.789571	1	3	mutant	78
479.834	1.1129	0.898555	1	3	mutant	74
479.834	1.1129	0.898555	1	3	mutant	74
445.11	1.21911	0.82027	1	3	mutant	70
386.431	1.86303	0.53676	1	3	mutant	66
467.647	1.63567	0.611371	1	3	mutant	61
515.241	1.50833	0.662984	1	3	mutant	56
356.382	1.43621	0.696276	1	3	mutant	51
419.999	1.23662	0.808656	1	3	mutant	46
452.727	1.60334	0.6237	1	3	mutant	41
385.17	1.65229	0.605222	1	3	mutant	36
377.185	1.68187	0.594578	1	3	mutant	31
324.127	1.88646	0.530094	1	3	mutant	26
201.621	2.35102	0.425347	1	3	mutant	21
153.08	1.78614	0.559867	1	3	mutant	17
214.176	1.52571	0.655431	1	3	mutant	13
257.095	1.37608	0.726705	1	3	mutant	11
253.418	1.07239	0.932495	1	3	mutant	6
213.808	1.14892	0.870382	1	3	mutant	1
388.532	1.37804	0.72567	2	3	mutant	97
554.273	1.97087	0.50739	2	3	mutant	94
540.299	1.81084	0.552229	2	3	mutant	91
523.174	1.38167	0.723763	2	3	mutant	86
564.044	1.13047	0.884588	2	3	mutant	81
470.483	1.37774	0.725827	2	3	mutant	76
518.341	1.35062	0.740402	2	3	mutant	71
475.264	1.30455	0.766545	2	3	mutant	66
486.506	1.19187	0.839019	2	3	mutant	61
503.684	1.62806	0.614227	2	3	mutant	56
439.436	1.43759	0.695609	2	3	mutant	51
427.827	1.31274	0.761764	2	3	mutant	46
333.32	1.77834	0.562323	2	3	mutant	41
311.257	1.19394	0.837561	2	3	mutant	36
281.576	1.18255	0.845634	2	3	mutant	18
275.429	1.46795	0.681224	2	3	mutant	11
324.022	1.80428	0.554237	3	3	mutant	107
295.864	3.20191	0.312313	3	3	mutant	101
406.446	1.69078	0.591444	3	3	mutant	96
395.887	2.02652	0.493457	3	3	mutant	91
385.065	1.33591	0.748552	3	3	mutant	86
402.086	1.57859	0.633477	3	3	mutant	81
360.322	2.72069	0.367554	3	3	mutant	76
328.803	2.85856	0.349827	3	3	mutant	71
366.101	2.04493	0.489015	3	3	mutant	66
296.285	2.96194	0.337617	3	3	mutant	61
355.016	2.10246	0.475633	3	3	mutant	56
350.761	1.83171	0.545938	3	3	mutant	51
292.923	1.51612	0.65958	3	3	mutant	46
276.585	1.27993	0.781296	3	3	mutant	45
449.996	1.94062	0.515299	4	3	mutant	105
416.375	1.32725	0.75344	4	3	mutant	101
453.148	1.44674	0.69121	4	3	mutant	96
434.446	1.25378	0.797591	4	3	mutant	91
401.823	1.18004	0.847432	4	3	mutant	86
437.073	1.17491	0.851132	4	3	mutant	81
438.438	1.14961	0.869859	4	3	mutant	76
452.097	1.21947	0.820026	4	3	mutant	71
456.405	1.50698	0.66358	4	3	mutant	66
392.577	1.60035	0.624864	4	3	mutant	61
326.911	1.3905	0.719165	4	3	mutant	56
250.056	1.07483	0.93038	4	3	mutant	52
458.401	1.32745	0.753322	5	3	mutant	105
465.072	1.75924	0.568426	5	3	mutant	101
386.326	1.34753	0.742099	5	3	mutant	96
452.412	1.38943	0.719718	5	3	mutant	91
502.056	1.23252	0.811346	5	3	mutant	86
522.438	1.1235	0.890075	5	3	mutant	81
442.641	1.25173	0.798897	5	3	mutant	76
448.262	1.20371	0.830768	5	3	mutant	71
376.66	1.2527	0.798275	5	3	mutant	66
402.769	1.58931	0.629202	5	3	mutant	61
384.54	1.60505	0.623033	5	3	mutant	56
341.463	1.14212	0.875564	5	3	mutant	51
395.729	1.26226	0.792228	5	3	mutant	45
267.549	1.83414	0.545214	5	3	mutant	40
296.968	1.3933	0.71772	5	3	mutant	35
323.602	1.58686	0.630175	5	3	mutant	30
316.983	1.59473	0.627066	5	3	mutant	25
337.628	1.93222	0.517539	5	3	mutant	20
278.634	1.70339	0.587063	5	3	mutant	16
193.636	1.22623	0.815508	5	3	mutant	11
165.898	1.4332	0.697742	5	3	mutant	6
146.724	1.39656	0.716045	5	3	mutant	1
469.695	1.80942	0.552665	6	3	mutant	107
370.303	1.7733	0.56392	6	3	mutant	101
466.281	1.73148	0.57754	6	3	mutant	96
564.99	1.21352	0.824049	6	3	mutant	91
373.665	1.67464	0.597142	6	3	mutant	86
507.729	1.68329	0.594074	6	3	mutant	81
491.549	1.2717	0.78635	6	3	mutant	76
496.224	1.47458	0.678159	6	3	mutant	71
459.399	1.70342	0.587054	6	3	mutant	66
466.491	1.68364	0.593951	6	3	mutant	61
445.583	1.43078	0.69892	6	3	mutant	56
442.904	1.36239	0.734006	6	3	mutant	51
471.481	1.27113	0.786705	6	3	mutant	46
443.797	1.21355	0.824031	6	3	mutant	41
372.615	1.23687	0.80849	6	3	mutant	36
378.393	1.15821	0.863402	6	3	mutant	31
343.669	2.09012	0.478441	6	3	mutant	26
354.228	1.56339	0.639637	6	3	mutant	21
330.168	1.26814	0.788554	6	3	mutant	16
322.288	1.80638	0.553593	6	3	mutant	11
295.97	2.72906	0.366427	6	3	mutant	6
253.418	2.02879	0.492904	6	3	mutant	1
402.296	1.86074	0.53742	7	3	mutant	107
445.793	1.36924	0.730334	7	3	mutant	102
558.213	1.13655	0.879858	7	3	mutant	97
422.206	1.05945	0.943882	7	3	mutant	95
471.166	1.83708	0.544342	7	3	mutant	91
478.573	1.20899	0.827137	7	3	mutant	86
445.688	1.09531	0.912984	7	3	mutant	81
437.073	1.1774	0.849329	7	3	mutant	76
441.38	1.28701	0.776996	7	3	mutant	71
403.346	1.29325	0.773245	7	3	mutant	66
451.466	1.18062	0.847012	7	3	mutant	61
398.461	1.96183	0.509728	7	3	mutant	56
480.78	1.6913	0.591262	7	3	mutant	51
462.078	1.90155	0.525886	7	3	mutant	46
362.423	1.47687	0.677108	7	3	mutant	41
413.695	2.13003	0.469476	7	3	mutant	36
413.17	1.56522	0.638887	7	3	mutant	31
324.6	2.10365	0.475364	7	3	mutant	26
327.384	2.63062	0.380138	7	3	mutant	21
303.639	1.58926	0.629225	7	3	mutant	16
234.506	2.90409	0.344342	7	3	mutant	11
234.244	1.78599	0.559915	7	3	mutant	6
176.142	1.94134	0.515108	7	3	mutant	1
352.863	2.17291	0.460213	8	3	mutant	108
432.555	1.90341	0.525372	8	3	mutant	105
436.547	1.51087	0.66187	8	3	mutant	101
451.361	1.72367	0.580159	8	3	mutant	96
448.945	1.32191	0.75648	8	3	mutant	91
418.371	1.3846	0.722232	8	3	mutant	86
401.928	1.17741	0.849321	8	3	mutant	81
481.515	1.293	0.773397	8	3	mutant	76
379.497	1.40219	0.71317	8	3	mutant	71
422.784	1.76436	0.566777	8	3	mutant	66
381.808	1.7455	0.572902	8	3	mutant	61
431.609	2.02475	0.493887	8	3	mutant	56
400.089	1.70742	0.58568	8	3	mutant	51
383.594	1.23952	0.806763	8	3	mutant	46
415.639	1.25759	0.79517	8	3	mutant	41
367.887	1.17077	0.854136	8	3	mutant	36
350.236	1.15632	0.864811	8	3	mutant	31
341.778	1.2271	0.814932	8	3	mutant	26
310.048	1.17265	0.852768	8	3	mutant	21
268.547	1.26218	0.792282	8	3	mutant	16
229.463	1.15877	0.862986	8	3	mutant	11
202.041	1.32769	0.753189	8	3	mutant	6
182.236	1.44757	0.690814	8	3	mutant	1
417.478	1.45571	0.68695	9	3	mutant	115
576.757	1.63475	0.611712	9	3	mutant	110
508.99	1.40231	0.713108	9	3	mutant	105
562.836	1.86123	0.53728	9	3	mutant	100
540.615	1.30498	0.766296	9	3	mutant	95
516.134	1.16042	0.861755	9	3	mutant	90
350.446	1.86273	0.536847	9	3	mutant	75
484.457	1.12271	0.890702	9	3	mutant	70
454.198	2.04232	0.489639	9	3	mutant	65
452.78	2.27099	0.440337	9	3	mutant	60
424.255	1.68732	0.592656	9	3	mutant	55
446.581	1.96619	0.508598	9	3	mutant	50
406.236	2.78555	0.358995	9	3	mutant	45
374.296	2.46045	0.406429	9	3	mutant	40
355.699	2.16057	0.462841	9	3	mutant	35
328.382	2.08597	0.479394	9	3	mutant	30
338.521	2.00726	0.49819	9	3	mutant	25
257.148	2.15976	0.463015	9	3	mutant	20
263.452	2.04259	0.489575	9	3	mutant	15
224.998	1.93139	0.517763	9	3	mutant	10
194.109	1.20338	0.83099	9	3	mutant	5
188.593	1.07666	0.928797	9	3	mutant	1
406.498	1.2689	0.788087	10	3	mutant	161
447.211	1.54415	0.647605	10	3	mutant	156
351.339	1.79114	0.558302	10	3	mutant	151
393.103	1.26326	0.791604	10	3	mutant	147
336.525	1.55305	0.643896	10	3	mutant	141
344.195	1.3794	0.724952	10	3	mutant	136
320.187	1.65178	0.605408	10	3	mutant	131
364.42	1.29213	0.773916	10	3	mutant	126
356.645	1.11783	0.894588	10	3	mutant	121
353.861	1.2026	0.831532	10	3	mutant	116
335.264	1.9947	0.50133	10	3	mutant	111
359.114	1.8019	0.554969	10	3	mutant	106
354.018	1.44257	0.693207	10	3	mutant	101
286.934	1.26902	0.788009	10	3	mutant	96
334.424	1.43351	0.697587	10	3	mutant	91
302.904	1.03889	0.962564	10	3	mutant	86
257.095	1.89756	0.526992	10	3	mutant	81
240.337	1.61285	0.62002	10	3	mutant	76
181.816	1.33843	0.747145	10	3	mutant	71
320.765	1.10341	0.906283	11	3	mutant	157
348.029	3.04258	0.328669	11	3	mutant	152
296.915	2.11908	0.471902	11	3	mutant	147
343.512	2.3182	0.431369	11	3	mutant	143
321.553	2.05203	0.487322	11	3	mutant	138
360.585	1.10889	0.901799	11	3	mutant	133
326.701	1.58895	0.629347	11	3	mutant	128
305.478	1.48934	0.671439	11	3	mutant	123
320.607	1.96096	0.509956	11	3	mutant	118
319.294	2.31514	0.431939	11	3	mutant	113
335.422	1.58166	0.632247	11	3	mutant	108
334.581	1.7487	0.571853	11	3	mutant	103
338.153	1.51381	0.660585	11	3	mutant	98
323.339	1.2714	0.786532	11	3	mutant	93
363.947	1.13594	0.880326	11	3	mutant	88
361.846	2.61862	0.381881	11	3	mutant	83
267.077	1.37236	0.728672	11	3	mutant	78
369.463	1.47057	0.680007	11	3	mutant	73
370.934	1.47555	0.677713	11	3	mutant	68
320.818	1.21439	0.823462	11	3	mutant	63
471.964	1.29263	0.773614	1	4	mutant	161
491.854	1.25958	0.793913	1	4	mutant	156
476.836	1.33859	0.747054	1	4	mutant	151
512.786	1.34537	0.743292	1	4	mutant	146
451.636	1.14178	0.875826	1	4	mutant	141
440.683	1.36562	0.73227	1	4	mutant	136
487.89	1.41111	0.708662	1	4	mutant	131
482.211	1.23463	0.809957	1	4	mutant	126
443.909	1.2617	0.792582	1	4	mutant	121
445.488	1.06662	0.93754	1	4	mutant	116
492.963	1.39317	0.717786	1	4	mutant	111
446.429	1.37408	0.727758	1	4	mutant	106
477.507	1.43196	0.698344	1	4	mutant	101
430.805	1.49266	0.669946	1	4	mutant	96
442.161	1.30377	0.767006	1	4	mutant	91
444.715	1.53323	0.652217	1	4	mutant	86
408.764	1.74501	0.573063	1	4	mutant	81
456.004	1.48495	0.673423	1	4	mutant	76
395.358	1.33671	0.748107	1	4	mutant	71
382.288	1.27009	0.787343	1	4	mutant	66
345.363	2.04231	0.489642	1	4	mutant	61
289.992	1.52926	0.65391	1	4	mutant	56
325.204	1.421	0.703731	1	4	mutant	51
311.731	1.40672	0.710874	1	4	mutant	46
201.661	1.37814	0.725617	1	4	mutant	42
634.717	1.28258	0.779676	2	4	mutant	161
603.403	1.49216	0.67017	2	4	mutant	156
574.373	1.25309	0.79803	2	4	mutant	151
621.176	1.09889	0.910005	2	4	mutant	146
595.339	1.23667	0.808625	2	4	mutant	141
609.417	1.0479	0.954292	2	4	mutant	136
628.938	1.22587	0.815744	2	4	mutant	131
565.469	1.24166	0.805371	2	4	mutant	126
610.996	1.41628	0.706076	2	4	mutant	121
618.724	1.60296	0.623844	2	4	mutant	116
596.515	1.31268	0.761799	2	4	mutant	111
601.622	1.21956	0.819965	2	4	mutant	106
576.624	1.30231	0.767864	2	4	mutant	101
577.397	1.65918	0.602706	2	4	mutant	96
582.874	1.71178	0.584187	2	4	mutant	91
558.178	1.29968	0.769418	2	4	mutant	86
526.091	1.42058	0.703936	2	4	mutant	81
557.91	1.19208	0.838873	2	4	mutant	76
453.652	1.49513	0.668838	2	4	mutant	71
527.536	1.75343	0.570311	2	4	mutant	66
520.648	1.33397	0.74964	2	4	mutant	61
480.935	1.47072	0.679941	2	4	mutant	56
487.755	1.42855	0.70001	2	4	mutant	51
419.314	1.23826	0.807583	2	4	mutant	46
371.234	1.42588	0.701319	2	4	mutant	41
411.15	1.53588	0.651093	2	4	mutant	36
311.966	1.36686	0.731601	2	4	mutant	31
395.493	1.11585	0.896174	2	4	mutant	26
272.991	1.45035	0.689487	2	4	mutant	21
272.218	1.18105	0.846706	2	4	mutant	16
261.567	1.45895	0.685423	2	4	mutant	11
278.535	1.30281	0.767569	2	4	mutant	6
184.525	1.45113	0.689119	2	4	mutant	1
595.137	1.44562	0.691747	3	4	mutant	161
566.679	1.18993	0.840388	3	4	mutant	156
555.491	1.29717	0.770911	3	4	mutant	151
511.946	1.70343	0.587051	3	4	mutant	146
582.168	1.08951	0.917848	3	4	mutant	141
556.633	1.04598	0.956045	3	4	mutant	136
469.175	1.43742	0.695693	3	4	mutant	131
578.506	1.13924	0.877777	3	4	mutant	126
617.514	1.2377	0.807951	3	4	mutant	121
558.649	1.02901	0.971808	3	4	mutant	116
535.835	1.10493	0.905033	3	4	mutant	111
526.461	1.32288	0.755924	3	4	mutant	106
571.215	1.30833	0.764336	3	4	mutant	101
545.78	1.54188	0.648557	3	4	mutant	96
515.205	1.78497	0.560233	3	4	mutant	91
520.615	1.51491	0.660105	3	4	mutant	86
523.706	1.2677	0.788827	3	4	mutant	81
470.653	1.59337	0.627599	3	4	mutant	76
509.191	1.57477	0.635012	3	4	mutant	71
410.276	1.9686	0.507974	3	4	mutant	66
479.557	1.80029	0.555468	3	4	mutant	61
414.476	1.78238	0.561048	3	4	mutant	56
451.032	1.67884	0.595649	3	4	mutant	51
388.941	1.91415	0.522426	3	4	mutant	46
362.969	1.79366	0.557519	3	4	mutant	41
366.53	2.29774	0.43521	3	4	mutant	36
299.769	1.32873	0.752599	3	4	mutant	29
240.434	1.48863	0.671757	3	4	mutant	26
210.329	1.35364	0.738747	3	4	mutant	21
198.771	1.48946	0.671382	3	4	mutant	16
154.017	1.66035	0.602281	3	4	mutant	11
210.363	1.59756	0.625953	3	4	mutant	6
288.749	1.1305	0.884564	3	4	mutant	1
517.692	1.17507	0.851014	4	4	mutant	161
525.05	1.30479	0.766405	4	4	mutant	156
525.084	1.33102	0.751303	4	4	mutant	151
544.436	1.34527	0.743348	4	4	mutant	146
490.947	1.36261	0.733885	4	4	mutant	141
466.218	1.38708	0.720937	4	4	mutant	136
486.613	1.69641	0.589479	4	4	mutant	131
452.779	1.85642	0.53867	4	4	mutant	126
504.42	1.90879	0.523891	4	4	mutant	121
551.761	2.32565	0.429987	4	4	mutant	116
484.059	1.67986	0.595289	4	4	mutant	111
510.3	1.33628	0.748347	4	4	mutant	106
450.427	1.82763	0.547156	4	4	mutant	101
429.36	1.22562	0.815912	4	4	mutant	96
523.471	1.34185	0.745241	4	4	mutant	91
388.706	1.68506	0.593451	4	4	mutant	86
443.707	1.22482	0.816449	4	4	mutant	81
375.669	1.41362	0.707403	4	4	mutant	76
343.985	1.73906	0.575022	4	4	mutant	71
325.304	1.32625	0.754007	4	4	mutant	66
228.338	2.31687	0.431617	4	4	mutant	61
173.001	1.41096	0.70874	4	4	mutant	56
293.016	1.0441	0.957762	4	4	mutant	51
266.305	1.24563	0.802807	4	4	mutant	46
264.188	1.21912	0.820264	4	4	mutant	41
257.401	1.29344	0.773129	4	4	mutant	36
236.368	1.34935	0.741099	4	4	mutant	31
205.961	1.66624	0.600154	4	4	mutant	26
169.137	1.14188	0.875751	4	4	mutant	24
678.933	1.19539	0.836548	5	4	mutant	161
647.585	1.23353	0.810684	5	4	mutant	156
698.118	1.32737	0.753371	5	4	mutant	151
634.952	1.22507	0.816277	5	4	mutant	146
736.656	1.29828	0.77025	5	4	mutant	141
713.405	1.34891	0.741337	5	4	mutant	136
716.832	1.65711	0.60346	5	4	mutant	131
684.107	1.39678	0.715934	5	4	mutant	126
623.629	1.25767	0.795123	5	4	mutant	121
625.544	1.23561	0.809315	5	4	mutant	116
697.379	1.01683	0.983453	5	4	mutant	111
656.422	1.34834	0.741651	5	4	mutant	106
603.403	1.17254	0.852849	5	4	mutant	101
654.439	1.2014	0.83236	5	4	mutant	96
640.126	1.31239	0.76197	5	4	mutant	91
639.857	1.09768	0.911011	5	4	mutant	86
587.107	1.33528	0.748908	5	4	mutant	81
555.927	1.25181	0.798844	5	4	mutant	77
564.562	1.0368	0.964505	5	4	mutant	71
516.449	1.12943	0.8854	5	4	mutant	66
415.316	1.39651	0.716073	5	4	mutant	61
422.137	1.37063	0.729592	5	4	mutant	56
384.707	1.34469	0.743667	5	4	mutant	51
346.438	1.08341	0.923012	5	4	mutant	46
340.827	1.12853	0.886108	5	4	mutant	41
319.525	1.25135	0.799136	5	4	mutant	36
323.322	1.53398	0.651897	5	4	mutant	31
307.195	1.32939	0.752227	5	4	mutant	26
242.853	1.37232	0.728693	5	4	mutant	21
214.025	1.68364	0.59395	5	4	mutant	16
172.564	1.20707	0.828454	5	4	mutant	11
176.663	1.18536	0.843624	5	4	mutant	6
232.269	1.52461	0.655906	5	4	mutant	1
581.798	1.50829	0.663001	6	4	mutant	154
595.944	1.10751	0.902928	6	4	mutant	151
563.655	1.02131	0.979136	6	4	mutant	146
561.774	1.38225	0.723461	6	4	mutant	141
612.978	1.51668	0.659333	6	4	mutant	136
556.297	1.88978	0.529161	6	4	mutant	131
540.304	1.44392	0.692558	6	4	mutant	126
559.825	1.53265	0.652465	6	4	mutant	121
560.9	1.76721	0.565865	6	4	mutant	116
550.115	2.08621	0.479337	6	4	mutant	111
558.246	1.61455	0.619369	6	4	mutant	106
592.752	1.8557	0.53888	6	4	mutant	101
523.74	2.24781	0.444878	6	4	mutant	96
527.671	2.52285	0.396378	6	4	mutant	91
545.142	1.74919	0.571692	6	4	mutant	86
552.836	2.28937	0.436801	6	4	mutant	81
493.87	2.31495	0.431975	6	4	mutant	76
571.752	2.36058	0.423625	6	4	mutant	71
508.25	1.92462	0.519583	6	4	mutant	66
423.077	2.25762	0.442944	6	4	mutant	61
489.032	2.30644	0.433568	6	4	mutant	56
469.276	1.87284	0.533949	6	4	mutant	51
457.852	2.15164	0.464762	6	4	mutant	46
488.595	1.90562	0.524765	6	4	mutant	41
425.463	2.2763	0.43931	6	4	mutant	36
397.542	2.28525	0.437589	6	4	mutant	31
393.544	2.69279	0.371362	6	4	mutant	26
354.267	2.433	0.411015	6	4	mutant	21
350.537	2.15544	0.463942	6	4	mutant	16
360.987	2.25574	0.443313	6	4	mutant	11
408.227	1.83779	0.544132	6	4	mutant	6
382.322	1.96422	0.509107	6	4	mutant	1
296.947	1.22262	0.817917	7	4	mutant	124
325.808	1.53504	0.651447	7	4	mutant	119
352.688	1.21664	0.821935	7	4	mutant	114
387.698	1.53613	0.650987	7	4	mutant	109
357.526	1.48937	0.671426	7	4	mutant	104
388.101	1.29204	0.773968	7	4	mutant	99
379.903	1.38176	0.723712	7	4	mutant	94
380.944	1.26727	0.789098	7	4	mutant	89
330.311	1.81105	0.552166	7	4	mutant	84
287.472	1.91235	0.522918	7	4	mutant	79
336.291	1.15685	0.864413	7	4	mutant	74
291.672	1.49203	0.670228	7	4	mutant	69
241.744	1.7558	0.569541	7	4	mutant	64
177.201	1.3147	0.760629	7	4	mutant	59
228.136	1.36655	0.731769	7	4	mutant	54
259.451	1.15846	0.863217	7	4	mutant	49
240.938	1.19167	0.83916	7	4	mutant	44
204.718	1.29063	0.774817	7	4	mutant	40
500.187	1.61324	0.619871	8	4	mutant	126
518.901	1.17728	0.849415	8	4	mutant	121
526.595	1.31	0.763361	8	4	mutant	116
513.223	1.60883	0.621571	8	4	mutant	111
546.856	1.30648	0.765417	8	4	mutant	106
543.496	1.27679	0.783212	8	4	mutant	101
514.063	1.35807	0.736338	8	4	mutant	96
496.961	1.30304	0.767439	8	4	mutant	91
390.486	1.21594	0.82241	8	4	mutant	86
390.453	1.13274	0.882818	8	4	mutant	83
416.122	1.34288	0.74467	8	4	mutant	75
437.861	1.27917	0.781757	8	4	mutant	70
412.326	1.28193	0.780076	8	4	mutant	62
461.38	1.63436	0.611859	8	4	mutant	56
407.655	1.39366	0.717536	8	4	mutant	51
446.328	1.49624	0.668342	8	4	mutant	46
433.56	1.73295	0.577049	8	4	mutant	41
487.218	1.79976	0.555631	8	4	mutant	36
309.009	2.49707	0.40047	8	4	mutant	31
275.41	2.26334	0.441824	8	4	mutant	26
265.431	2.87068	0.34835	8	4	mutant	21
239.392	2.05278	0.487145	8	4	mutant	16
225.953	2.51474	0.397655	8	4	mutant	11
225.045	2.16954	0.460927	8	4	mutant	6
215.201	1.73821	0.575305	8	4	mutant	1
685.552	1.18937	0.840783	9	4	mutant	106
563.554	1.56929	0.637231	9	4	mutant	101
487.99	1.25708	0.795494	9	4	mutant	96
538.59	1.04973	0.952624	9	4	mutant	91
391.259	2.08681	0.4792	9	4	mutant	86
426.807	2.01376	0.496583	9	4	mutant	81
413.468	2.24231	0.445969	9	4	mutant	76
432.283	1.76815	0.565561	9	4	mutant	71
468.234	1.83034	0.546348	9	4	mutant	66
358.601	1.64372	0.608377	9	4	mutant	61
406.345	1.57812	0.633666	9	4	mutant	56
339.886	1.54	0.649349	9	4	mutant	51
321.575	2.05638	0.486292	9	4	mutant	46
239.392	1.56648	0.638375	9	4	mutant	41
345.733	1.48191	0.674807	9	4	mutant	36
347.513	1.29864	0.770035	9	4	mutant	31
286.8	1.26706	0.789227	9	4	mutant	26
258.779	1.26408	0.791089	9	4	mutant	21
297.955	1.29399	0.772805	9	4	mutant	16
221.047	1.49902	0.667102	9	4	mutant	11
235.965	1.2964	0.771369	9	4	mutant	6
337.299	1.33891	0.746878	9	4	mutant	1
820.653	1.71339	0.58364	1	5	sib	161
846.155	1.58375	0.631414	1	5	sib	156
763.77	1.76317	0.567161	1	5	sib	151
724.527	1.22679	0.815135	1	5	sib	146
748.684	1.59127	0.62843	1	5	sib	141
708.903	1.2095	0.826785	1	5	sib	136
692.003	1.60969	0.621239	1	5	sib	131
742.838	2.14715	0.465735	1	5	sib	126
706.551	2.00225	0.499438	1	5	sib	121
650.542	1.75829	0.568735	1	5	sib	116
625.611	1.41935	0.704549	1	5	sib	111
662.1	2.05239	0.487237	1	5	sib	106
541.446	1.82269	0.548641	1	5	sib	101
594.163	1.28954	0.775473	1	5	sib	96
539.968	1.57379	0.63541	1	5	sib	91
455.399	1.36809	0.730948	1	5	sib	86
431.074	1.3903	0.719268	1	5	sib	81
270.706	1.36479	0.732712	1	5	sib	79
791.657	1.11469	0.897111	2	5	sib	161
570.341	2.29375	0.435967	2	5	sib	156
615.565	1.77387	0.56374	2	5	sib	151
689.416	1.90197	0.525771	2	5	sib	146
711.255	1.95778	0.510784	2	5	sib	141
680.512	1.70596	0.586179	2	5	sib	136
590.03	1.51328	0.660818	2	5	sib	131
610.29	1.86412	0.536446	2	5	sib	126
697.211	2.2482	0.4448	2	5	sib	121
631.357	1.70486	0.586557	2	5	sib	116
644.897	1.27052	0.787077	2	5	sib	111
525.621	1.71504	0.583078	2	5	sib	106
565.201	2.16218	0.462497	2	5	sib	101
543.933	1.73293	0.577056	2	5	sib	96
548.536	1.11772	0.894676	2	5	sib	91
501.396	1.40813	0.710164	2	5	sib	86
616.17	1.72658	0.57918	2	5	sib	81
424.69	1.29672	0.771176	2	5	sib	77
899.039	1.14495	0.873398	3	5	sib	161
880.593	1.38674	0.721113	3	5	sib	156
830.699	2.06774	0.48362	3	5	sib	151
855.965	1.53278	0.65241	3	5	sib	146
825.726	1.4248	0.701851	3	5	sib	141
803.047	1.4783	0.676455	3	5	sib	136
934.788	1.52533	0.655597	3	5	sib	131
735.345	1.80861	0.55291	3	5	sib	126
754.497	1.42696	0.700789	3	5	sib	121
779.898	1.51359	0.660679	3	5	sib	116
641.604	1.49497	0.668908	3	5	sib	111
637.707	1.76972	0.565062	3	5	sib	106
672.314	1.55009	0.645123	3	5	sib	101
635.993	2.05431	0.486782	3	5	sib	96
654.876	1.14696	0.871869	3	5	sib	91
692.507	1.58585	0.630576	3	5	sib	86
651.785	1.473	0.678887	3	5	sib	81
615.767	1.3451	0.74344	3	5	sib	76
658.505	1.58089	0.632555	3	5	sib	71
551.694	2.50578	0.399077	3	5	sib	66
538.691	1.7838	0.560601	3	5	sib	61
511.577	1.24787	0.801364	3	5	sib	57
520.38	1.16365	0.859364	3	5	sib	52
498.372	1.59875	0.625489	3	5	sib	46
408.361	1.32757	0.753255	3	5	sib	42
310.252	1.21453	0.823364	3	5	sib	36
259.988	1.77087	0.564695	4	5	sib	30
280.988	1.11686	0.895364	4	5	sib	36
366.06	1.28364	0.779034	4	5	sib	41
368.109	1.51259	0.661117	4	5	sib	46
376.274	1.31296	0.761637	4	5	sib	51
471.661	1.41957	0.704437	4	5	sib	56
493.904	1.83877	0.543842	4	5	sib	61
436.046	1.19499	0.836828	4	5	sib	66
562.815	1.03195	0.969036	4	5	sib	71
516.516	1.36114	0.734678	4	5	sib	76
529.451	1.33924	0.746692	4	5	sib	81
573.5	1.54282	0.648164	4	5	sib	86
607.266	1.19057	0.839932	4	5	sib	91
686.459	1.72229	0.580623	4	5	sib	96
628.434	1.85019	0.540484	4	5	sib	101
691.566	1.32411	0.755225	4	5	sib	106
677.623	1.71237	0.583987	4	5	sib	111
651.684	1.58632	0.630391	4	5	sib	116
715.522	1.18827	0.841563	4	5	sib	121
747.979	1.09532	0.912976	4	5	sib	126
700.739	1.79688	0.556519	4	5	sib	131
728.29	1.10443	0.905442	4	5	sib	136
640.597	1.17361	0.852074	4	5	sib	141
768.071	1.3364	0.748278	4	5	sib	146
739.814	1.21187	0.825171	4	5	sib	151
801.434	1.28153	0.780319	4	5	sib	156
777.008	1.74417	0.573339	4	5	sib	161
620.504	1.38058	0.724334	5	5	sib	161
660.353	1.16477	0.858536	5	5	sib	156
641.806	1.13247	0.883029	5	5	sib	151
570.778	1.10527	0.90476	5	5	sib	146
568.426	1.31295	0.761641	5	5	sib	141
572.256	1.57754	0.633898	5	5	sib	136
526.495	1.44477	0.692153	5	5	sib	131
517.255	1.42375	0.702371	5	5	sib	126
496.928	1.64433	0.608151	5	5	sib	121
516.381	2.0165	0.495908	5	5	sib	116
486.176	2.05458	0.486718	5	5	sib	111
491.384	2.30774	0.433325	5	5	sib	106
411.15	2.41834	0.413507	5	5	sib	101
475.055	1.71276	0.583853	5	5	sib	96
457.919	1.99089	0.502288	5	5	sib	91
401.238	1.2823	0.779852	5	5	sib	87
681.52	1.12275	0.890667	6	5	sib	161
651.315	1.2163	0.822165	6	5	sib	156
679.067	1.54721	0.646324	6	5	sib	151
716.664	1.41057	0.708933	6	5	sib	146
657.228	1.04773	0.954443	6	5	sib	141
661.663	1.58264	0.631855	6	5	sib	136
653.7	1.42261	0.702932	6	5	sib	131
653.465	1.04789	0.954303	6	5	sib	126
643.856	1.39472	0.716991	6	5	sib	121
609.585	1.54472	0.647366	6	5	sib	116
614.188	1.26721	0.789136	6	5	sib	111
545.713	1.17026	0.854508	6	5	sib	106
438.936	1.21473	0.823226	6	5	sib	101
492.022	1.86452	0.536332	6	5	sib	96
360.751	1.40201	0.713262	6	5	sib	93
712.465	1.76751	0.565767	7	5	sib	161
675.439	1.70958	0.584939	7	5	sib	156
666.77	1.76659	0.566064	7	5	sib	151
647.921	1.6414	0.609235	7	5	sib	146
639.622	1.49583	0.668527	7	5	sib	141
636.632	1.59885	0.625448	7	5	sib	136
602.227	1.68675	0.592855	7	5	sib	131
604.612	1.28762	0.776628	7	5	sib	126
630.886	1.49315	0.669726	7	5	sib	121
620.404	2.32711	0.429718	7	5	sib	116
597.052	2.8233	0.354195	7	5	sib	111
657.228	2.05192	0.487349	7	5	sib	106
490.678	2.07012	0.483065	7	5	sib	101
467.999	1.79917	0.555813	7	5	sib	96
508.082	1.52737	0.654719	7	5	sib	91
470.553	2.37107	0.42175	7	5	sib	86
371.503	1.4281	0.700229	7	5	sib	81
572.021	1.38022	0.724524	8	5	sib	161
516.818	1.56758	0.637924	8	5	sib	156
576.557	1.72002	0.581387	8	5	sib	151
535.13	1.55707	0.642234	8	5	sib	146
506.033	2.38545	0.419208	8	5	sib	141
500.422	2.32629	0.429868	8	5	sib	136
458.255	1.63206	0.612723	8	5	sib	131
471.292	1.36733	0.731352	8	5	sib	126
483.085	1.62707	0.614603	8	5	sib	121
410.209	1.26142	0.792754	8	5	sib	116
441.523	2.26357	0.441779	8	5	sib	111
424.791	1.45766	0.686031	8	5	sib	106
309.211	1.32444	0.755034	8	5	sib	101
298.526	1.20507	0.829825	8	5	sib	98
242.92	1.3175	0.759011	9	5	sib	59
433.661	1.53288	0.652365	9	5	sib	64
418.407	1.31684	0.759393	9	5	sib	69
426.303	1.37925	0.725034	9	5	sib	74
425.261	1.19933	0.833801	9	5	sib	76
452.947	1.45884	0.685477	9	5	sib	81
471.258	1.81677	0.550427	9	5	sib	86
523.303	1.25874	0.794445	9	5	sib	91
491.585	1.6293	0.613761	9	5	sib	96
533.248	1.46326	0.683407	9	5	sib	101
507.007	1.58975	0.629028	9	5	sib	106
540.976	1.18791	0.841814	9	5	sib	111
630.382	1.57424	0.635225	9	5	sib	116
603.907	1.3394	0.746602	9	5	sib	121
605.754	1.49492	0.668931	9	5	sib	126
619.53	1.31347	0.761343	9	5	sib	131
628.602	1.69761	0.589065	9	5	sib	136
559.59	1.55955	0.641209	9	5	sib	141
560.295	1.58969	0.629053	9	5	sib	146
603.167	2.00557	0.498612	9	5	sib	151
643.385	1.04576	0.956247	9	5	sib	156
624.503	1.15456	0.866131	9	5	sib	161
598.027	1.73556	0.576183	1	6	sib	161
515.541	1.66653	0.600049	1	6	sib	156
662.167	2.45323	0.407626	1	6	sib	151
647.115	2.2267	0.449095	1	6	sib	146
559.556	2.67235	0.374203	1	6	sib	141
648.963	2.16894	0.461054	1	6	sib	136
658.538	1.56599	0.638575	1	6	sib	131
613.751	2.6472	0.377757	1	6	sib	126
702.956	2.07037	0.483006	1	6	sib	121
586.267	2.3402	0.427315	1	6	sib	116
568.023	1.91309	0.522714	1	6	sib	111
571.181	1.97637	0.505979	1	6	sib	106
547.931	1.65129	0.605586	1	6	sib	101
423.245	1.2951	0.772142	1	6	sib	96
456.911	1.53949	0.649567	1	6	sib	91
490.477	1.76418	0.566835	1	6	sib	86
424.018	2.03253	0.491997	1	6	sib	81
418.373	1.41155	0.708443	1	6	sib	76
379.231	1.56605	0.638548	1	6	sib	71
410.007	1.65652	0.603676	1	6	sib	66
384.775	1.14755	0.87142	1	6	sib	61
312.974	1.06136	0.942183	1	6	sib	56
295.435	1.2838	0.778939	1	6	sib	51
293.587	1.35897	0.735849	1	6	sib	46
253.705	1.17648	0.849997	1	6	sib	41
200.72	1.40784	0.710308	1	6	sib	36
183.786	1.53804	0.65018	1	6	sib	31
180.829	1.34745	0.742143	1	6	sib	26
131.775	1.14494	0.873411	1	6	sib	23
654.137	1.47093	0.679842	2	6	sib	161
667.543	1.46597	0.68214	2	6	sib	156
611.735	2.73636	0.365449	2	6	sib	151
668.047	2.52231	0.396462	2	6	sib	146
594.7	1.78515	0.560178	2	6	sib	141
557.036	1.03845	0.962969	2	6	sib	131
491.921	1.67927	0.595498	2	6	sib	126
500.59	1.28065	0.780855	2	6	sib	121
490.947	1.28171	0.780206	2	6	sib	116
479.658	1.48361	0.67403	2	6	sib	111
504.017	2.16293	0.462337	2	6	sib	106
476.567	2.01069	0.497341	2	6	sib	101
475.66	1.9577	0.510803	2	6	sib	96
431.376	1.65567	0.603984	2	6	sib	91
284.683	1.31424	0.760894	2	6	sib	86
247.12	1.32707	0.75354	2	6	sib	81
300.845	1.15341	0.866996	2	6	sib	76
195.814	1.28441	0.778565	2	6	sib	72
680.042	2.08697	0.479164	3	6	sib	161
745.828	2.72444	0.367048	3	6	sib	156
753.489	3.14415	0.318051	3	6	sib	151
595.305	2.60402	0.384021	3	6	sib	146
549.678	2.07868	0.481075	3	6	sib	141
572.055	1.7688	0.565355	3	6	sib	136
571.92	1.51373	0.660619	3	6	sib	131
563.319	1.55265	0.644062	3	6	sib	126
564.865	3.17107	0.315351	3	6	sib	121
442.061	1.85388	0.539409	3	6	sib	116
462.758	1.0681	0.936242	3	6	sib	111
483.018	1.81006	0.552467	3	6	sib	106
530.627	2.24968	0.444507	3	6	sib	101
452.51	2.0291	0.492829	3	6	sib	96
403.892	2.57138	0.388897	3	6	sib	91
431.712	2.24623	0.445191	3	6	sib	86
400.902	2.38879	0.418622	3	6	sib	81
439.238	2.13223	0.468992	3	6	sib	76
355.073	1.67765	0.596072	3	6	sib	71
391.562	2.08984	0.478505	3	6	sib	66
337.266	1.39117	0.718818	3	6	sib	61
347.144	1.25111	0.799291	3	6	sib	56
288.077	1.32835	0.752813	3	6	sib	51
239.359	1.73707	0.575683	3	6	sib	46
174.949	1.34831	0.741667	3	6	sib	41
155.563	1.32032	0.757395	3	6	sib	36
217.99	1.2124	0.82481	3	6	sib	31
227.095	1.27191	0.786222	3	6	sib	26
162.719	1.50394	0.66492	3	6	sib	20
154.152	1.32105	0.756972	3	6	sib	18
511.778	3.39222	0.294792	4	6	sib	161
520.648	2.48109	0.403049	4	6	sib	156
499.481	1.43304	0.697818	4	6	sib	151
515.407	1.74786	0.572127	4	6	sib	146
528.544	1.84806	0.541109	4	6	sib	141
530.459	2.00663	0.498349	4	6	sib	136
504.555	1.4141	0.707162	4	6	sib	131
555.457	1.40356	0.712473	4	6	sib	126
538.792	1.42416	0.702166	4	6	sib	121
487.251	2.25007	0.44443	4	6	sib	116
448.545	1.21605	0.822337	4	6	sib	111
473.576	1.14485	0.873477	4	6	sib	106
444.513	1.70317	0.587139	4	6	sib	101
327.69	1.18026	0.847271	4	6	sib	96
388.235	1.91793	0.521395	4	6	sib	91
382.557	1.16039	0.861782	4	6	sib	86
192.958	1.47518	0.677884	4	6	sib	81
266.742	1.93331	0.517247	4	6	sib	76
275.578	1.89082	0.528871	4	6	sib	71
245.205	1.74954	0.571579	4	6	sib	66
260.123	1.66501	0.600597	4	6	sib	61
201.392	1.11724	0.895066	4	6	sib	56
189.565	1.26657	0.789532	4	6	sib	51
170.85	1.40644	0.711015	4	6	sib	49
520.648	1.33891	0.746877	5	6	sib	161
576.523	1.44451	0.692275	5	6	sib	156
443.942	1.46013	0.684872	5	6	sib	151
482.682	1.45933	0.685244	5	6	sib	146
510.266	1.71355	0.583585	5	6	sib	141
551.526	1.55288	0.643966	5	6	sib	136
462.052	2.50372	0.399405	5	6	sib	131
478.818	2.30581	0.433688	5	6	sib	126
506.604	1.3507	0.740355	5	6	sib	121
471.762	1.21038	0.826188	5	6	sib	116
450.46	1.57798	0.633721	5	6	sib	111
443.942	1.22012	0.81959	5	6	sib	106
267.212	1.73907	0.575021	5	6	sib	101
276.082	1.61861	0.617813	5	6	sib	96
288.883	1.46091	0.684505	5	6	sib	91
201.123	1.31639	0.759652	5	6	sib	86
187.179	1.55332	0.643783	5	6	sib	81
233.848	1.47147	0.679592	5	6	sib	76
219.401	2.09773	0.476706	5	6	sib	71
212.715	1.52722	0.654784	5	6	sib	66
145.786	1.60724	0.622184	5	6	sib	61
150.725	1.22392	0.817046	5	6	sib	56
136.915	1.6093	0.621387	5	6	sib	51
127.541	1.28427	0.778651	5	6	sib	47
179.183	1.05552	0.947401	5	6	sib	41
150.59	1.25125	0.799203	5	6	sib	36
115.614	1.21254	0.824714	5	6	sib	31
103.182	1.37185	0.728945	5	6	sib	26
97.6384	1.31778	0.758854	5	6	sib	21
103.35	1.18736	0.842206	5	6	sib	16
105.501	1.53046	0.6534	5	6	sib	11
99.2511	1.33617	0.748405	5	6	sib	6
95.1857	1.18485	0.843986	5	6	sib	4
488.226	2.00373	0.499069	6	6	sib	144
617.346	1.18955	0.840657	6	6	sib	139
609.047	1.12437	0.889389	6	6	sib	134
569.77	1.67119	0.598378	6	6	sib	129
680.109	1.6049	0.623094	6	6	sib	124
541.547	1.4217	0.703383	6	6	sib	121
539.397	1.50886	0.662751	6	6	sib	116
455.702	1.68712	0.592726	6	6	sib	111
486.378	1.55931	0.64131	6	6	sib	106
482.447	2.68901	0.371884	6	6	sib	101
446.597	1.57778	0.633801	6	6	sib	96
367.841	1.91252	0.522872	6	6	sib	91
294.965	2.08549	0.479504	6	6	sib	86
173.673	2.18417	0.457841	6	6	sib	81
197.058	2.5563	0.391191	6	6	sib	76
239.997	1.80395	0.554341	6	6	sib	71
291.034	1.83115	0.546105	6	6	sib	66
277.796	1.22772	0.814517	6	6	sib	61
249.438	1.51612	0.659579	6	6	sib	56
190.002	1.35875	0.735972	6	6	sib	51
200.921	1.21839	0.820753	6	6	sib	46
256.998	1.08917	0.918133	6	6	sib	41
193.059	1.29646	0.771329	6	6	sib	38
146.29	1.31376	0.761172	6	6	sib	31
130.834	1.59392	0.627382	6	6	sib	26
126.869	1.27454	0.784597	6	6	sib	21
109.7	1.13473	0.881264	6	6	sib	16
130.061	1.25222	0.798584	6	6	sib	11
132.548	1.2195	0.820009	6	6	sib	6
97.1008	1.37959	0.724855	6	6	sib	2
585.83	1.21075	0.825937	7	6	sib	123
654.708	1.02171	0.978754	7	6	sib	118
586.603	1.08172	0.924457	7	6	sib	116
554.651	1.36169	0.734381	7	6	sib	111
641.47	1.26747	0.788974	7	6	sib	106
619.799	1.22484	0.81643	7	6	sib	101
577.464	1.56831	0.637629	7	6	sib	96
507.041	1.48729	0.672363	7	6	sib	91
455.467	1.22373	0.817175	7	6	sib	86
430.099	1.46612	0.682071	7	6	sib	81
452.879	1.1158	0.896219	7	6	sib	76
407.084	1.39047	0.71918	7	6	sib	71
352.15	1.43777	0.69552	7	6	sib	66
284.952	1.15443	0.866227	7	6	sib	61
276.049	1.0904	0.917097	7	6	sib	56
338.576	1.38433	0.72237	7	6	sib	51
272.117	1.34075	0.745849	7	6	sib	46
241.778	1.1302	0.884797	7	6	sib	41
210.127	1.05705	0.946029	7	6	sib	36
174.613	1.15396	0.866581	7	6	sib	31
151.531	1.03962	0.961887	7	6	sib	26
149.213	1.09117	0.916448	7	6	sib	21
149.717	1.80796	0.553108	7	6	sib	16
179.015	1.32219	0.756318	7	6	sib	11
185.432	1.61024	0.621025	7	6	sib	8
199.409	1.32713	0.753503	7	6	sib	3
214.26	1.11055	0.900457	7	6	sib	1
172.295	1.61873	0.617767	8	6	sib	24
212.11	1.55862	0.641594	8	6	sib	26
208.515	2.46627	0.40547	8	6	sib	31
304.07	1.63909	0.610093	8	6	sib	35
340.222	1.84279	0.542655	8	6	sib	58
317.006	1.73881	0.575106	8	6	sib	63
360.449	2.12041	0.471607	8	6	sib	66
350.974	2.05529	0.486549	8	6	sib	71
391.83	1.40697	0.710749	8	6	sib	76
493.971	1.86729	0.535534	8	6	sib	81
527.637	1.8487	0.540921	8	6	sib	86
442.161	2.42577	0.41224	8	6	sib	91
419.549	1.22567	0.815881	8	6	sib	96
442.329	1.53276	0.652417	8	6	sib	101
382.187	1.76263	0.567333	8	6	sib	106
504.454	2.25147	0.444154	8	6	sib	111
461.783	4.24938	0.235328	8	6	sib	116
623.36	2.7221	0.367363	8	6	sib	121
641.269	2.17361	0.460065	8	6	sib	126
614.389	1.62578	0.615091	8	6	sib	131
663.713	1.55834	0.641708	8	6	sib	136
796.764	2.26336	0.441821	8	6	sib	141
767.97	2.28089	0.438426	8	6	sib	146
750.196	2.20767	0.452967	8	6	sib	151
798.007	1.74364	0.573513	8	6	sib	156
848.91	1.89056	0.528944	8	6	sib	161
624.167	1.84478	0.542069	1	7	sib	161
647.787	1.16425	0.858925	1	7	sib	156
552.265	1.5759	0.634558	1	7	sib	151
505.025	1.37783	0.725781	1	7	sib	146
496.188	1.55245	0.644143	1	7	sib	141
559.959	1.70996	0.584808	1	7	sib	136
452.275	1.45315	0.688162	1	7	sib	131
495.248	2.25823	0.442824	1	7	sib	126
437.928	1.23903	0.807085	1	7	sib	121
369.689	1.93304	0.517319	1	7	sib	116
431.376	1.03859	0.962843	1	7	sib	111
471.392	1.5288	0.654109	1	7	sib	106
448.848	1.35006	0.740709	1	7	sib	101
389.21	1.08199	0.92422	1	7	sib	96
390.923	1.35049	0.740474	1	7	sib	91
408.059	1.48663	0.672661	1	7	sib	80
403.489	1.587	0.630121	1	7	sib	76
367.337	1.35328	0.738944	1	7	sib	71
286.229	1.32719	0.753474	1	7	sib	66
224.642	1.38457	0.722246	1	7	sib	64
161.98	1.1229	0.890549	2	7	sib	1
190.237	1.93392	0.517085	2	7	sib	6
226.457	1.46353	0.683278	2	7	sib	11
249.371	1.43164	0.698498	2	7	sib	16
222.257	1.41323	0.7076	2	7	sib	21
291.302	1.39999	0.714293	2	7	sib	26
301.819	1.64167	0.609136	2	7	sib	31
223.265	2.07092	0.482878	2	7	sib	36
301.449	1.7187	0.581834	2	7	sib	41
358.668	1.70526	0.586421	2	7	sib	46
418.508	1.12103	0.892036	2	7	sib	51
384.674	1.44583	0.691644	2	7	sib	56
363.338	1.38107	0.724075	2	7	sib	61
521.69	1.45407	0.687725	2	7	sib	66
537.549	1.6763	0.59655	2	7	sib	71
652.222	1.28222	0.779897	2	7	sib	76
583.882	1.52994	0.653621	2	7	sib	81
640.193	1.98997	0.502519	2	7	sib	86
755.303	1.78688	0.559634	2	7	sib	91
706.484	1.3873	0.720826	2	7	sib	96
704.166	1.3145	0.760748	2	7	sib	101
712.229	2.07962	0.480856	2	7	sib	106
760.209	1.46949	0.680507	2	7	sib	111
763.468	2.11477	0.472864	2	7	sib	116
824.819	1.5914	0.628377	2	7	sib	121
796.865	2.00429	0.498929	2	7	sib	126
848.506	1.39628	0.716188	2	7	sib	131
825.088	1.65433	0.604474	2	7	sib	136
854.756	1.89969	0.526402	2	7	sib	141
910.026	1.83567	0.54476	2	7	sib	146
902.231	1.22586	0.815752	2	7	sib	151
967.951	1.08528	0.921423	2	7	sib	156
937.947	1.4131	0.707665	2	7	sib	161
189.968	1.3396	0.746494	3	7	sib	6
184.928	1.7112	0.584385	3	7	sib	11
219.737	1.59588	0.626613	3	7	sib	16
174.378	1.29455	0.772469	3	7	sib	21
209.321	1.29743	0.770755	3	7	sib	26
190.842	1.27074	0.786941	3	7	sib	31
268.489	1.97315	0.506804	3	7	sib	36
300.878	2.06701	0.483791	3	7	sib	41
376.946	1.22831	0.814125	3	7	sib	46
373.62	1.43142	0.698609	3	7	sib	51
444.581	1.38602	0.721491	3	7	sib	56
468.604	1.36145	0.73451	3	7	sib	61
484.194	1.61947	0.617486	3	7	sib	66
510.905	1.55062	0.644905	3	7	sib	71
512.82	2.61641	0.382203	3	7	sib	76
471.224	1.53946	0.649578	3	7	sib	81
503.244	1.53134	0.653024	3	7	sib	86
568.56	1.64781	0.606864	3	7	sib	91
536.81	1.76894	0.565309	3	7	sib	96
572.962	2.04446	0.489126	3	7	sib	101
524.008	1.30737	0.764892	3	7	sib	106
643.184	1.77884	0.562164	3	7	sib	111
688.945	1.78065	0.561591	3	7	sib	116
676.447	1.11303	0.898452	3	7	sib	121
741.931	1.67821	0.595875	3	7	sib	126
629.643	1.45741	0.686151	3	7	sib	131
718.445	1.28721	0.776875	3	7	sib	136
788.331	2.129	0.469705	3	7	sib	141
739.713	1.43147	0.698583	3	7	sib	146
718.008	1.71861	0.581865	3	7	sib	151
711.121	2.2425	0.445931	3	7	sib	156
814.807	1.56916	0.637284	3	7	sib	161
213.454	1.93306	0.517316	4	7	sib	47
272.151	1.67877	0.595674	4	7	sib	52
282.332	1.64705	0.607146	4	7	sib	57
376.341	2.0438	0.489284	4	7	sib	62
255.352	1.14425	0.873934	4	7	sib	67
353.998	1.3897	0.71958	4	7	sib	72
330.143	1.11939	0.893346	4	7	sib	77
376.677	1.39105	0.71888	4	7	sib	82
373.821	1.46891	0.680778	4	7	sib	87
414.207	2.00727	0.498188	4	7	sib	92
313.478	1.97238	0.507001	4	7	sib	96
424.22	1.89951	0.526452	4	7	sib	101
493.198	1.30897	0.763961	4	7	sib	106
564.629	1.69102	0.59136	4	7	sib	111
490.745	1.37043	0.729697	4	7	sib	116
615.868	1.6851	0.593435	4	7	sib	121
496.692	2.20705	0.453094	4	7	sib	126
498.272	1.35981	0.735395	4	7	sib	131
568.359	1.27603	0.783683	4	7	sib	136
700.873	1.51363	0.660661	4	7	sib	141
635.758	1.49629	0.668319	4	7	sib	146
676.816	1.27625	0.783546	4	7	sib	151
678.966	1.61999	0.61729	4	7	sib	156
674.666	1.82345	0.548412	4	7	sib	161
309.345	1.30853	0.764214	5	7	sib	81
410.982	1.33789	0.747446	5	7	sib	86
360.886	1.35847	0.736121	5	7	sib	91
429.999	1.65146	0.605524	5	7	sib	96
359.105	1.6466	0.607313	5	7	sib	101
470.821	1.61664	0.618566	5	7	sib	106
466.722	2.36786	0.422322	5	7	sib	111
451.972	1.598	0.625783	5	7	sib	116
503.345	2.3791	0.420327	5	7	sib	121
545.444	1.75888	0.568543	5	7	sib	126
589.593	1.8668	0.535676	5	7	sib	131
666.736	1.2953	0.772022	5	7	sib	136
495.013	1.59088	0.628583	5	7	sib	141
490.913	1.46509	0.68255	5	7	sib	146
606.258	1.91399	0.522468	5	7	sib	151
618.421	1.3714	0.729183	5	7	sib	156
651.583	1.08488	0.92176	5	7	sib	161
133.522	1.6244	0.61561	6	7	sib	1
144.072	2.35121	0.425313	6	7	sib	6
142.963	3.35874	0.29773	6	7	sib	11
150.456	1.64457	0.608063	6	7	sib	15
184.626	1.49621	0.668353	6	7	sib	18
473.711	1.38823	0.720341	6	7	sib	66
493.4	1.20654	0.828818	6	7	sib	71
561.169	1.24186	0.805245	6	7	sib	76
564.495	1.65728	0.603398	6	7	sib	81
576.591	1.54892	0.645611	6	7	sib	86
592.685	2.96012	0.337824	6	7	sib	91
571.719	1.62072	0.617011	6	7	sib	96
598.867	1.14266	0.875148	6	7	sib	101
578.338	2.29539	0.435657	6	7	sib	106
587.88	2.08287	0.480106	6	7	sib	111
695.094	1.96323	0.509365	6	7	sib	116
720.159	1.66663	0.600013	6	7	sib	121
643.788	1.92045	0.520711	6	7	sib	126
777.411	1.67341	0.597582	6	7	sib	131
777.277	1.7597	0.568277	6	7	sib	136
774.992	1.58547	0.630728	6	7	sib	141
902.466	1.71659	0.582552	6	7	sib	146
855.361	1.23917	0.806992	6	7	sib	151
824.618	1.60936	0.621363	6	7	sib	156
783.224	1.95376	0.511834	6	7	sib	161
626.821	1.44086	0.694028	7	7	sib	143
531.367	1.49861	0.667284	7	7	sib	141
644.763	1.719	0.581735	7	7	sib	136
530.191	1.33384	0.749713	7	7	sib	131
617.984	2.33348	0.428545	7	7	sib	126
598.43	1.61078	0.620818	7	7	sib	121
601.319	1.28415	0.778722	7	7	sib	116
622.42	2.64688	0.377803	7	7	sib	111
560.866	1.85928	0.537842	7	7	sib	106
529.149	1.80741	0.553276	7	7	sib	101
495.718	1.81716	0.55031	7	7	sib	96
469.309	1.28218	0.779924	7	7	sib	91
459.364	3.12385	0.320118	7	7	sib	86
456.004	1.77288	0.564054	7	7	sib	81
558.212	1.49826	0.667442	7	7	sib	76
461.548	1.25645	0.795893	7	7	sib	71
493.097	1.74831	0.571982	7	7	sib	66
476.13	1.23395	0.810404	7	7	sib	61
439.574	1.85734	0.538404	7	7	sib	56
387.362	1.32637	0.753936	7	7	sib	51
374.796	1.21461	0.823309	7	7	sib	46
278.501	1.28344	0.779156	7	7	sib	41
269.094	1.25679	0.795678	7	7	sib	36
284.011	1.12115	0.891938	7	7	sib	31
251.757	1.52829	0.654324	7	7	sib	26
210.9	1.21957	0.819961	7	7	sib	21
202.131	1.61867	0.617792	7	7	sib	16
166.214	1.85898	0.53793	7	7	sib	13
179.653	1.77229	0.564242	8	7	sib	1
130.33	1.11112	0.899989	8	7	sib	6
172.362	1.21752	0.821343	8	7	sib	11
187.885	1.38738	0.720783	8	7	sib	16
193.798	1.4553	0.687146	8	7	sib	21
208.952	2.8143	0.355328	8	7	sib	26
227.935	1.8284	0.546925	8	7	sib	31
229.984	1.40471	0.711892	8	7	sib	36
224.777	1.36118	0.734658	8	7	sib	41
311.025	1.53559	0.651217	8	7	sib	46
368.177	1.50894	0.662716	8	7	sib	51
458.625	1.20753	0.828135	8	7	sib	56
409.167	1.24281	0.804628	8	7	sib	61
467.26	1.28303	0.779402	8	7	sib	66
495.315	1.32118	0.756901	8	7	sib	71
529.619	1.58242	0.631942	8	7	sib	76
452.342	1.4042	0.712147	8	7	sib	81
481.439	1.82872	0.54683	8	7	sib	86
517.423	1.54503	0.647236	8	7	sib	91
622.957	1.84997	0.54055	8	7	sib	96
566.545	2.73067	0.366211	8	7	sib	101
587.645	1.76758	0.565745	8	7	sib	106
473.812	1.40975	0.709344	8	7	sib	107
545.176	3.02593	0.330477	8	7	sib	116
435.946	1.6041	0.623402	8	7	sib	119
211.471	2.11868	0.471991	9	7	sib	1
230.186	1.88138	0.531524	9	7	sib	6
185.903	1.69707	0.589252	9	7	sib	11
148.507	2.05992	0.485456	9	7	sib	16
194.84	1.65787	0.603182	9	7	sib	21
210.9	1.45176	0.68882	9	7	sib	26
235.024	1.80715	0.553358	9	7	sib	31
275.444	1.53407	0.651863	9	7	sib	36
307.027	1.53331	0.652185	9	7	sib	41
385.379	1.39111	0.718848	9	7	sib	46
399.323	1.48697	0.672507	9	7	sib	51
499.985	1.50816	0.663061	9	7	sib	56
439.306	1.28133	0.780438	9	7	sib	61
449.318	1.22407	0.816946	9	7	sib	66
425.261	1.21743	0.821399	9	7	sib	71
399.088	1.26486	0.790604	9	7	sib	76
423.514	1.49545	0.668693	9	7	sib	81
402.28	1.70718	0.585761	9	7	sib	86
483.925	1.90994	0.523576	9	7	sib	91
494.677	1.68035	0.595113	9	7	sib	96
530.224	2.46787	0.405207	9	7	sib	101
564.361	1.79915	0.555819	9	7	sib	106
473.308	1.25279	0.798219	9	7	sib	111
575.616	1.01702	0.983269	9	7	sib	123
