# Supplementary material for: DNA-damage induced cell death in yap1;wwtr1 mutant epidermal basal cells
Source: eLife. 2022 May 30;11:e72302. doi: 10.7554/eLife.72302 (PMC9197390; doi:10.7554/eLife.72302)
Supplement: Figure 6—figure supplement 1—source data 1. [file elife-72302-fig6-figsupp1-data1.xlsx]

## Sheet: Figure6_figuresupplement1B
samples	treatment	foci
0.5kpa	control	3
0.5kpa	control	5
0.5kpa	control	3
0.5kpa	control	0
0.5kpa	control	2
0.5kpa	control	1
0.5kpa	control	2
0.5kpa	control	4
0.5kpa	control	3
0.5kpa	control	0
0.5kpa	control	0
0.5kpa	control	0
0.5kpa	control	2
0.5kpa	control	0
0.5kpa	control	1
0.5kpa	control	1
0.5kpa	control	4
0.5kpa	control	2
0.5kpa	control	4
0.5kpa	control	1
0.5kpa	control	0
0.5kpa	control	1
0.5kpa	control	1
0.5kpa	control	2
0.5kpa	control	7
0.5kpa	control	3
0.5kpa	control	2
0.5kpa	control	1
0.5kpa	control	5
0.5kpa	control	2
0.5kpa	control	0
0.5kpa	control	0
0.5kpa	control	2
0.5kpa	control	3
0.5kpa	control	2
0.5kpa	control	2
0.5kpa	control	0
0.5kpa	control	1
0.5kpa	control	0
0.5kpa	control	2
0.5kpa	control	0
0.5kpa	control	0
0.5kpa	control	5
0.5kpa	control	1
0.5kpa	control	0
0.5kpa	control	1
0.5kpa	control	1
0.5kpa	control	2
0.5kpa	control	2
0.5kpa	control	0
0.5kpa	control	2
0.5kpa	control	0
0.5kpa	control	2
0.5kpa	control	1
0.5kpa	control	0
0.5kpa	control	2
0.5kpa	control	1
0.5kpa	control	4
0.5kpa	control	1
0.5kpa	control	2
0.5kpa	control	0
0.5kpa	control	2
0.5kpa	control	0
0.5kpa	control	1
0.5kpa	control	0
0.5kpa	control	0
0.5kpa	control	1
0.5kpa	control	1
0.5kpa	control	0
0.5kpa	control	3
0.5kpa	control	0
0.5kpa	control	2
0.5kpa	control	3
0.5kpa	control	3
0.5kpa	control	0
0.5kpa	UV	8
0.5kpa	UV	1
0.5kpa	UV	10
0.5kpa	UV	22
0.5kpa	UV	35
0.5kpa	UV	28
0.5kpa	UV	16
0.5kpa	UV	10
0.5kpa	UV	1
0.5kpa	UV	8
0.5kpa	UV	3
0.5kpa	UV	2
0.5kpa	UV	4
0.5kpa	UV	11
0.5kpa	UV	8
0.5kpa	UV	19
0.5kpa	UV	0
0.5kpa	UV	14
0.5kpa	UV	41
0.5kpa	UV	4
0.5kpa	UV	5
0.5kpa	UV	12
0.5kpa	UV	10
0.5kpa	UV	9
0.5kpa	UV	34
0.5kpa	UV	31
0.5kpa	UV	20
0.5kpa	UV	4
0.5kpa	UV	33
0.5kpa	UV	6
0.5kpa	UV	6
0.5kpa	UV	8
0.5kpa	UV	7
0.5kpa	UV	4
0.5kpa	UV	17
0.5kpa	UV	2
0.5kpa	UV	8
0.5kpa	UV	5
0.5kpa	UV	8
0.5kpa	UV	10
0.5kpa	UV	10
0.5kpa	UV	5
0.5kpa	UV	9
0.5kpa	UV	0
0.5kpa	UV	4
0.5kpa	UV	13
0.5kpa	UV	12
0.5kpa	UV	24
0.5kpa	UV	9
0.5kpa	UV	2
0.5kpa	UV	6
0.5kpa	UV	7
0.5kpa	UV	4
0.5kpa	UV	3
0.5kpa	UV	3
0.5kpa	UV	0
0.5kpa	UV	8
0.5kpa	UV	8
0.5kpa	UV	3
0.5kpa	UV	22
0.5kpa	UV	13
0.5kpa	UV	17
0.5kpa	UV	13
0.5kpa	UV	0
12kpa	control	4
12kpa	control	3
12kpa	control	7
12kpa	control	22
12kpa	control	12
12kpa	control	8
12kpa	control	26
12kpa	control	18
12kpa	control	22
12kpa	control	17
12kpa	control	26
12kpa	control	15
12kpa	control	10
12kpa	control	24
12kpa	control	26
12kpa	control	10
12kpa	control	10
12kpa	control	22
12kpa	control	4
12kpa	control	14
12kpa	control	21
12kpa	control	10
12kpa	control	11
12kpa	control	10
12kpa	control	12
12kpa	control	13
12kpa	control	18
12kpa	control	18
12kpa	control	14
12kpa	control	9
12kpa	control	13
12kpa	control	5
12kpa	control	12
12kpa	control	9
12kpa	control	1
12kpa	control	14
12kpa	control	9
12kpa	control	13
12kpa	control	7
12kpa	control	14
12kpa	control	15
12kpa	control	19
12kpa	control	10
12kpa	control	13
12kpa	control	10
12kpa	control	22
12kpa	control	10
12kpa	control	21
12kpa	control	9
12kpa	control	7
12kpa	control	6
12kpa	control	19
12kpa	control	11
12kpa	control	16
12kpa	control	13
12kpa	control	24
12kpa	control	22
12kpa	control	24
12kpa	control	19
12kpa	control	22
12kpa	control	4
12kpa	control	5
12kpa	control	11
12kpa	control	16
12kpa	control	21
12kpa	control	16
12kpa	control	16
12kpa	control	6
12kpa	control	16
12kpa	control	12
12kpa	control	10
12kpa	control	9
12kpa	control	15
12kpa	control	1
12kpa	control	19
12kpa	control	11
12kpa	control	26
12kpa	control	21
12kpa	control	27
12kpa	control	5
12kpa	control	16
12kpa	control	11
12kpa	control	31
12kpa	control	18
12kpa	control	8
12kpa	control	9
12kpa	control	8
12kpa	control	13
12kpa	control	11
12kpa	control	13
12kpa	control	3
12kpa	control	9
12kpa	control	10
12kpa	control	14
12kpa	control	17
12kpa	control	18
12kpa	control	10
12kpa	control	6
12kpa	control	10
12kpa	control	16
12kpa	UV	17
12kpa	UV	16
12kpa	UV	36
12kpa	UV	28
12kpa	UV	23
12kpa	UV	47
12kpa	UV	61
12kpa	UV	38
12kpa	UV	55
12kpa	UV	22
12kpa	UV	34
12kpa	UV	16
12kpa	UV	19
12kpa	UV	17
12kpa	UV	69
12kpa	UV	48
12kpa	UV	20
12kpa	UV	94
12kpa	UV	141
12kpa	UV	80
12kpa	UV	82
12kpa	UV	58
12kpa	UV	53
12kpa	UV	20
12kpa	UV	24
12kpa	UV	48
12kpa	UV	23
12kpa	UV	35
12kpa	UV	31
12kpa	UV	2
12kpa	UV	8
12kpa	UV	45
12kpa	UV	47
12kpa	UV	30
12kpa	UV	71
12kpa	UV	79
12kpa	UV	76
12kpa	UV	85
12kpa	UV	71
12kpa	UV	26
12kpa	UV	42
12kpa	UV	28
12kpa	UV	70
12kpa	UV	22
12kpa	UV	51
12kpa	UV	57
12kpa	UV	53
12kpa	UV	29
12kpa	UV	29
12kpa	UV	67
12kpa	UV	5
12kpa	UV	41
12kpa	UV	78
12kpa	UV	76
12kpa	UV	42
12kpa	UV	20
12kpa	UV	4
12kpa	UV	66
12kpa	UV	24
12kpa	UV	32
12kpa	UV	50
12kpa	UV	20
12kpa	UV	76
12kpa	UV	76
12kpa	UV	117
12kpa	UV	80
12kpa	UV	84
12kpa	UV	53
25kpa	control	1
25kpa	control	2
25kpa	control	1
25kpa	control	8
25kpa	control	3
25kpa	control	6
25kpa	control	6
25kpa	control	16
25kpa	control	1
25kpa	control	13
25kpa	control	1
25kpa	control	3
25kpa	control	8
25kpa	control	1
25kpa	control	27
25kpa	control	8
25kpa	control	10
25kpa	control	8
25kpa	control	1
25kpa	control	4
25kpa	control	0
25kpa	control	10
25kpa	control	0
25kpa	control	3
25kpa	control	0
25kpa	control	3
25kpa	control	4
25kpa	control	1
25kpa	control	3
25kpa	control	14
25kpa	control	6
25kpa	control	5
25kpa	control	6
25kpa	control	6
25kpa	control	13
25kpa	control	1
25kpa	control	25
25kpa	control	5
25kpa	control	6
25kpa	control	8
25kpa	control	6
25kpa	control	4
25kpa	control	6
25kpa	control	4
25kpa	control	4
25kpa	control	3
25kpa	control	9
25kpa	control	10
25kpa	control	5
25kpa	control	3
25kpa	control	12
25kpa	control	6
25kpa	control	10
25kpa	control	5
25kpa	control	4
25kpa	control	5
25kpa	control	10
glass	control	5
glass	control	4
glass	control	40
glass	control	12
glass	control	16
glass	control	9
glass	control	8
glass	control	22
glass	control	12
glass	control	5
glass	control	9
glass	control	5
glass	control	3
glass	control	7
glass	control	7
glass	control	1
glass	control	5
glass	control	9
glass	control	8
glass	control	11
glass	control	11
glass	control	6
glass	control	3
glass	control	8
glass	control	14
glass	control	5
glass	control	4
glass	control	5
glass	control	2
glass	control	1
glass	control	9
glass	control	2
glass	control	8
glass	control	1
glass	control	13
glass	control	7
glass	control	13
glass	control	6
glass	control	6
glass	control	11
glass	control	6
glass	control	9
glass	control	28
glass	control	7
glass	control	7
glass	control	11
glass	control	12
glass	control	5
glass	control	38
glass	control	4
glass	control	25
glass	control	15
glass	control	14
glass	control	19
glass	control	5
glass	control	3
glass	control	10
glass	control	7
glass	control	8
glass	control	8
glass	control	8
glass	control	3
glass	control	8
glass	control	9
glass	control	7
glass	control	12
glass	control	12
glass	control	5
glass	control	10
glass	control	5
glass	control	5
glass	control	1
glass	control	4
glass	control	5
glass	control	3
glass	control	3
glass	control	11
glass	UV	46
glass	UV	35
glass	UV	36
glass	UV	45
glass	UV	53
glass	UV	48
glass	UV	34
glass	UV	64
glass	UV	67
glass	UV	47
glass	UV	50
glass	UV	34
glass	UV	59
glass	UV	0
glass	UV	0
glass	UV	47
glass	UV	53
glass	UV	57
glass	UV	75
glass	UV	66
glass	UV	81
glass	UV	92
glass	UV	48
glass	UV	56
glass	UV	61
glass	UV	79
glass	UV	90
glass	UV	73
glass	UV	62
glass	UV	13
glass	UV	31
glass	UV	16
glass	UV	21
glass	UV	1
glass	UV	28
glass	UV	28
glass	UV	23
glass	UV	46
glass	UV	39
glass	UV	16
glass	UV	26
glass	UV	30
glass	UV	28
glass	UV	35
glass	UV	19
glass	UV	8
glass	UV	25
glass	UV	38
glass	UV	51
glass	UV	56
glass	UV	47
glass	UV	31
glass	UV	0
glass	UV	59
glass	UV	41
glass	UV	43
glass	UV	2
glass	UV	0
glass	UV	23
glass	UV	31
glass	UV	43
glass	UV	65
glass	UV	51
glass	UV	12
glass	UV	76
glass	UV	6
glass	UV	33
glass	UV	4
glass	UV	21
glass	UV	49
glass	UV	53
glass	UV	42
glass	UV	43
glass	UV	36
glass	UV	19
glass	UV	16
glass	UV	18
glass	UV	9
glass	UV	9
glass	UV	16
glass	UV	10
glass	UV	14
glass	UV	23
glass	UV	22
glass	UV	27
glass	UV	12
glass	UV	19
glass	UV	6
glass	UV	31
glass	UV	15
glass	UV	6
glass	UV	10
glass	UV	4
25kpa	UV	1
25kpa	UV	1
25kpa	UV	8
25kpa	UV	9
25kpa	UV	6
25kpa	UV	2
25kpa	UV	3
25kpa	UV	19
25kpa	UV	8
25kpa	UV	20
25kpa	UV	9
25kpa	UV	3
25kpa	UV	9
25kpa	UV	1
25kpa	UV	38
25kpa	UV	11
25kpa	UV	41
25kpa	UV	16
25kpa	UV	52
25kpa	UV	36
25kpa	UV	17
25kpa	UV	19
25kpa	UV	28
25kpa	UV	32
25kpa	UV	30
25kpa	UV	26
25kpa	UV	22
25kpa	UV	10
25kpa	UV	1
25kpa	UV	16
25kpa	UV	43
25kpa	UV	43
25kpa	UV	12
25kpa	UV	16
25kpa	UV	32
25kpa	UV	47
25kpa	UV	47
25kpa	UV	24
25kpa	UV	49
25kpa	UV	28
25kpa	UV	45
25kpa	UV	2
25kpa	UV	45
25kpa	UV	31
25kpa	UV	9
25kpa	UV	1
25kpa	UV	27
25kpa	UV	25
25kpa	UV	3
25kpa	UV	19
25kpa	UV	4
25kpa	UV	16
25kpa	UV	2
25kpa	UV	16
25kpa	UV	22
25kpa	UV	33
25kpa	UV	32
25kpa	UV	18
25kpa	UV	69
25kpa	UV	54
25kpa	UV	37
25kpa	UV	2
25kpa	UV	23
25kpa	UV	29
25kpa	UV	80
25kpa	UV	47
25kpa	UV	12
25kpa	UV	35
25kpa	UV	27
25kpa	UV	26
25kpa	UV	45
25kpa	UV	41
25kpa	UV	1
25kpa	UV	25
25kpa	UV	18
25kpa	UV	27
25kpa	UV	2
25kpa	UV	36
25kpa	UV	33
25kpa	UV	78
0.5kpa	control	1
0.5kpa	control	0
0.5kpa	control	3
0.5kpa	control	4
0.5kpa	control	3
0.5kpa	control	0
0.5kpa	control	1
0.5kpa	control	5
0.5kpa	control	8
0.5kpa	control	1
0.5kpa	control	3
0.5kpa	control	1
0.5kpa	control	1
0.5kpa	control	0
0.5kpa	control	1
0.5kpa	control	1
0.5kpa	control	1
0.5kpa	control	1
0.5kpa	control	2
0.5kpa	control	0
0.5kpa	control	0
0.5kpa	control	0
0.5kpa	control	0
0.5kpa	control	3
0.5kpa	control	4
0.5kpa	control	1
0.5kpa	control	1
0.5kpa	control	3
0.5kpa	control	2
0.5kpa	control	2
0.5kpa	control	3
0.5kpa	control	3
0.5kpa	control	3
0.5kpa	control	6
0.5kpa	control	1
0.5kpa	control	2
0.5kpa	control	1
0.5kpa	control	5
0.5kpa	control	0
0.5kpa	control	6
0.5kpa	control	6
0.5kpa	control	1
0.5kpa	control	0
0.5kpa	control	3
0.5kpa	control	0
0.5kpa	control	0
0.5kpa	control	2
0.5kpa	control	6
0.5kpa	control	4
0.5kpa	control	2
0.5kpa	control	6
0.5kpa	control	1
0.5kpa	control	2
0.5kpa	control	9
0.5kpa	control	1
0.5kpa	control	0
0.5kpa	control	3
0.5kpa	control	5
0.5kpa	control	0
0.5kpa	control	0
0.5kpa	control	0
0.5kpa	control	0
0.5kpa	control	3
0.5kpa	control	0
0.5kpa	control	0
0.5kpa	control	0
0.5kpa	UV	7
0.5kpa	UV	5
0.5kpa	UV	6
0.5kpa	UV	7
0.5kpa	UV	3
0.5kpa	UV	16
0.5kpa	UV	6
0.5kpa	UV	3
0.5kpa	UV	0
0.5kpa	UV	8
0.5kpa	UV	5
0.5kpa	UV	12
0.5kpa	UV	23
0.5kpa	UV	38
0.5kpa	UV	27
0.5kpa	UV	11
0.5kpa	UV	3
0.5kpa	UV	22
0.5kpa	UV	2
0.5kpa	UV	2
0.5kpa	UV	5
0.5kpa	UV	8
0.5kpa	UV	3
0.5kpa	UV	2
0.5kpa	UV	36
0.5kpa	UV	1
0.5kpa	UV	0
0.5kpa	UV	0
0.5kpa	UV	8
0.5kpa	UV	2
0.5kpa	UV	4
0.5kpa	UV	2
0.5kpa	UV	8
0.5kpa	UV	0
0.5kpa	UV	5
0.5kpa	UV	1
0.5kpa	UV	14
0.5kpa	UV	0
0.5kpa	UV	7
0.5kpa	UV	12
0.5kpa	UV	1
0.5kpa	UV	2
0.5kpa	UV	1
0.5kpa	UV	2
0.5kpa	UV	0
0.5kpa	UV	0
0.5kpa	UV	0
0.5kpa	UV	0
0.5kpa	UV	7
0.5kpa	UV	2
0.5kpa	UV	1
0.5kpa	UV	4
0.5kpa	UV	1
0.5kpa	UV	2
0.5kpa	UV	3
0.5kpa	UV	1
0.5kpa	UV	0
0.5kpa	UV	0
0.5kpa	UV	1
0.5kpa	UV	1
0.5kpa	UV	0
0.5kpa	UV	1
0.5kpa	UV	5
0.5kpa	UV	3
0.5kpa	UV	5
0.5kpa	UV	2
0.5kpa	UV	9
0.5kpa	UV	3
0.5kpa	UV	32
0.5kpa	UV	6
0.5kpa	UV	3
0.5kpa	UV	5
0.5kpa	UV	8
0.5kpa	UV	28
0.5kpa	UV	12
0.5kpa	UV	3
0.5kpa	UV	0
0.5kpa	UV	2
0.5kpa	UV	9
0.5kpa	UV	0
0.5kpa	UV	0
0.5kpa	UV	1
0.5kpa	UV	0
0.5kpa	UV	5
0.5kpa	UV	0
0.5kpa	UV	6
0.5kpa	UV	5
0.5kpa	UV	5
0.5kpa	UV	4
0.5kpa	UV	6
0.5kpa	UV	5
0.5kpa	UV	2
0.5kpa	UV	2
0.5kpa	UV	9
0.5kpa	UV	4
0.5kpa	UV	1
0.5kpa	UV	3
0.5kpa	UV	5
0.5kpa	UV	1
0.5kpa	UV	2
0.5kpa	UV	14
0.5kpa	UV	0
0.5kpa	UV	3
0.5kpa	UV	1
0.5kpa	UV	2
0.5kpa	UV	10
0.5kpa	UV	4
0.5kpa	UV	5
0.5kpa	UV	2
0.5kpa	UV	0
0.5kpa	UV	1
12kpa	control	1
12kpa	control	16
12kpa	control	0
12kpa	control	15
12kpa	control	5
12kpa	control	11
12kpa	control	3
12kpa	control	11
12kpa	control	18
12kpa	control	8
12kpa	control	10
12kpa	control	5
12kpa	control	4
12kpa	control	3
12kpa	control	1
12kpa	control	14
12kpa	control	5
12kpa	control	2
12kpa	control	3
12kpa	control	9
12kpa	control	1
12kpa	control	5
12kpa	control	4
12kpa	control	4
12kpa	control	7
12kpa	control	8
12kpa	control	2
12kpa	control	3
12kpa	control	0
12kpa	control	3
12kpa	control	11
12kpa	control	5
12kpa	control	11
12kpa	control	8
12kpa	control	7
12kpa	control	5
12kpa	control	7
12kpa	control	10
12kpa	control	5
12kpa	control	9
12kpa	control	8
12kpa	control	4
12kpa	control	4
12kpa	control	3
12kpa	control	11
12kpa	control	17
12kpa	control	11
12kpa	control	10
12kpa	control	14
12kpa	control	7
12kpa	control	1
12kpa	control	4
12kpa	control	5
12kpa	control	3
12kpa	control	7
12kpa	control	0
12kpa	control	14
12kpa	control	18
12kpa	control	9
12kpa	control	13
12kpa	control	11
12kpa	UV	4
12kpa	UV	6
12kpa	UV	9
12kpa	UV	6
12kpa	UV	9
12kpa	UV	6
12kpa	UV	6
12kpa	UV	19
12kpa	UV	14
12kpa	UV	38
12kpa	UV	52
12kpa	UV	2
12kpa	UV	14
12kpa	UV	7
12kpa	UV	7
12kpa	UV	4
12kpa	UV	25
12kpa	UV	37
12kpa	UV	18
12kpa	UV	6
12kpa	UV	9
12kpa	UV	18
12kpa	UV	13
12kpa	UV	37
12kpa	UV	16
12kpa	UV	14
12kpa	UV	31
12kpa	UV	72
12kpa	UV	22
12kpa	UV	29
12kpa	UV	3
12kpa	UV	9
12kpa	UV	7
12kpa	UV	10
12kpa	UV	13
12kpa	UV	6
12kpa	UV	4
12kpa	UV	7
12kpa	UV	4
12kpa	UV	28
12kpa	UV	67
12kpa	UV	1
12kpa	UV	14
12kpa	UV	65
12kpa	UV	16
12kpa	UV	22
12kpa	UV	40
12kpa	UV	39
12kpa	UV	6
12kpa	UV	0
12kpa	UV	29
12kpa	UV	34
12kpa	UV	19
12kpa	UV	4
12kpa	UV	6
12kpa	UV	28
12kpa	UV	35
12kpa	UV	20
12kpa	UV	44
12kpa	UV	24
12kpa	UV	8
12kpa	UV	11
12kpa	UV	7
12kpa	UV	3
12kpa	UV	4
12kpa	UV	11
12kpa	UV	33
12kpa	UV	13
12kpa	UV	31
12kpa	UV	23
12kpa	UV	11
12kpa	UV	18
12kpa	UV	10
12kpa	UV	19
12kpa	UV	15
12kpa	UV	46
12kpa	UV	26
12kpa	UV	33
25kpa	control	5
25kpa	control	2
25kpa	control	4
25kpa	control	4
25kpa	control	4
25kpa	control	1
25kpa	control	10
25kpa	control	12
25kpa	control	6
25kpa	control	8
25kpa	control	6
25kpa	control	3
25kpa	control	8
25kpa	control	8
25kpa	control	10
25kpa	control	2
25kpa	control	5
25kpa	control	5
25kpa	control	12
25kpa	control	7
25kpa	control	5
25kpa	control	1
25kpa	control	6
25kpa	control	2
25kpa	control	4
25kpa	control	2
25kpa	control	5
25kpa	control	1
25kpa	control	6
25kpa	control	18
25kpa	control	9
25kpa	control	4
25kpa	control	21
25kpa	control	9
25kpa	control	3
25kpa	control	7
25kpa	control	13
25kpa	control	14
25kpa	control	11
25kpa	control	10
25kpa	control	3
25kpa	control	4
25kpa	control	3
25kpa	control	5
25kpa	control	5
25kpa	control	2
25kpa	control	7
25kpa	control	15
25kpa	control	8
25kpa	control	8
25kpa	control	2
25kpa	control	6
25kpa	control	12
25kpa	control	7
25kpa	control	14
25kpa	control	13
25kpa	control	7
25kpa	control	13
25kpa	UV	8
25kpa	UV	3
25kpa	UV	9
25kpa	UV	20
25kpa	UV	8
25kpa	UV	11
25kpa	UV	8
25kpa	UV	22
25kpa	UV	24
25kpa	UV	32
25kpa	UV	20
25kpa	UV	22
25kpa	UV	27
25kpa	UV	17
25kpa	UV	11
25kpa	UV	18
25kpa	UV	20
25kpa	UV	24
25kpa	UV	52
25kpa	UV	19
25kpa	UV	47
25kpa	UV	24
25kpa	UV	13
25kpa	UV	12
25kpa	UV	36
25kpa	UV	13
25kpa	UV	10
25kpa	UV	24
25kpa	UV	35
25kpa	UV	13
25kpa	UV	10
25kpa	UV	20
25kpa	UV	11
25kpa	UV	16
25kpa	UV	40
25kpa	UV	14
25kpa	UV	30
25kpa	UV	10
25kpa	UV	5
25kpa	UV	15
25kpa	UV	18
25kpa	UV	58
25kpa	UV	38
25kpa	UV	30
25kpa	UV	33
25kpa	UV	82
25kpa	UV	43
25kpa	UV	26
25kpa	UV	3
25kpa	UV	1
25kpa	UV	51
25kpa	UV	21
25kpa	UV	45
25kpa	UV	45
25kpa	UV	33
25kpa	UV	20
25kpa	UV	23
25kpa	UV	21
25kpa	UV	33
25kpa	UV	22
25kpa	UV	38
25kpa	UV	11
25kpa	UV	2
25kpa	UV	44
25kpa	UV	8
25kpa	UV	52
25kpa	UV	12
25kpa	UV	32
glass	control	6
glass	control	4
glass	control	3
glass	control	3
glass	control	2
glass	control	2
glass	control	2
glass	control	0
glass	control	2
glass	control	1
glass	control	4
glass	control	4
glass	control	10
glass	control	8
glass	control	8
glass	control	7
glass	control	2
glass	control	6
glass	control	5
glass	control	3
glass	control	4
glass	control	6
glass	control	0
glass	control	18
glass	control	3
glass	control	1
glass	control	2
glass	control	6
glass	control	5
glass	control	10
glass	control	8
glass	control	9
glass	control	2
glass	control	3
glass	control	12
glass	control	2
glass	control	7
glass	control	6
glass	control	5
glass	control	3
glass	control	6
glass	control	3
glass	control	6
glass	control	1
glass	control	14
glass	control	6
glass	control	2
glass	control	5
glass	control	2
glass	control	1
glass	control	3
glass	control	4
glass	control	2
glass	control	2
glass	control	2
glass	control	2
glass	control	9
glass	control	3
glass	control	9
glass	control	2
glass	control	5
glass	control	2
glass	control	2
glass	control	0
glass	control	1
glass	control	5
glass	control	2
glass	control	0
glass	control	3
glass	control	3
glass	control	2
glass	control	5
glass	control	5
glass	control	5
glass	control	3
glass	control	1
glass	control	3
glass	control	1
glass	control	7
glass	control	8
glass	control	4
glass	control	10
glass	control	3
glass	control	7
glass	control	5
glass	control	3
glass	control	3
glass	control	8
glass	control	1
glass	control	9
glass	control	3
glass	control	0
glass	control	6
glass	control	0
glass	control	3
glass	control	2
glass	control	12
glass	control	3
glass	control	4
glass	control	7
glass	control	7
glass	control	12
glass	control	3
glass	control	10
glass	control	7
glass	control	0
glass	control	1
glass	UV	5
glass	UV	2
glass	UV	2
glass	UV	8
glass	UV	10
glass	UV	9
glass	UV	2
glass	UV	44
glass	UV	4
glass	UV	3
glass	UV	6
glass	UV	7
glass	UV	4
glass	UV	18
glass	UV	36
glass	UV	19
glass	UV	28
glass	UV	16
glass	UV	23
glass	UV	2
glass	UV	7
glass	UV	2
glass	UV	2
glass	UV	11
glass	UV	28
glass	UV	4
glass	UV	2
glass	UV	2
glass	UV	4
glass	UV	21
glass	UV	26
glass	UV	17
glass	UV	20
glass	UV	29
glass	UV	2
glass	UV	12
glass	UV	6
glass	UV	2
glass	UV	1
glass	UV	6
glass	UV	11
glass	UV	4
glass	UV	1
glass	UV	24
glass	UV	1
glass	UV	26
glass	UV	1
glass	UV	9
glass	UV	15
glass	UV	18
glass	UV	10
glass	UV	26
glass	UV	22
glass	UV	5
glass	UV	54
glass	UV	14
glass	UV	0
glass	UV	2
glass	UV	1
glass	UV	12
glass	UV	20
glass	UV	29
glass	UV	20
glass	UV	13
glass	UV	7
glass	UV	0
glass	UV	0
glass	UV	13
glass	UV	7
glass	UV	4
glass	UV	3
glass	UV	12
glass	UV	11
glass	UV	14
glass	UV	1
glass	UV	8
glass	UV	8
glass	UV	10
glass	UV	4
glass	UV	1
glass	UV	2
glass	UV	6
glass	UV	5
glass	UV	2
glass	UV	8
glass	UV	49
glass	UV	8
glass	UV	11
glass	UV	12
glass	UV	63
glass	UV	15
glass	UV	4
glass	UV	6
glass	UV	3
glass	UV	6
glass	UV	12
glass	UV	3
glass	UV	3
glass	UV	3
glass	UV	8
glass	UV	14
glass	UV	3
glass	UV	2
glass	UV	9
glass	UV	1
glass	UV	12
glass	UV	34
glass	UV	18
glass	UV	21
glass	UV	15
