# Supplementary material for: DNA-damage induced cell death in yap1;wwtr1 mutant epidermal basal cells
Source: eLife. 2022 May 30;11:e72302. doi: 10.7554/eLife.72302 (PMC9197390; doi:10.7554/eLife.72302)
Supplement: Figure 6—source data 1. [file elife-72302-fig6-data1.xlsx]

## Sheet: Figure6
samples	foci
0.5kpa	3
0.5kpa	5
0.5kpa	3
0.5kpa	0
0.5kpa	2
0.5kpa	1
0.5kpa	2
0.5kpa	4
0.5kpa	3
0.5kpa	0
0.5kpa	0
0.5kpa	0
0.5kpa	2
0.5kpa	0
0.5kpa	1
0.5kpa	1
0.5kpa	4
0.5kpa	2
0.5kpa	4
0.5kpa	1
0.5kpa	0
0.5kpa	1
0.5kpa	1
0.5kpa	2
0.5kpa	7
0.5kpa	3
0.5kpa	2
0.5kpa	1
0.5kpa	5
0.5kpa	2
0.5kpa	0
0.5kpa	0
0.5kpa	2
0.5kpa	3
0.5kpa	2
0.5kpa	2
0.5kpa	0
0.5kpa	1
0.5kpa	0
0.5kpa	2
0.5kpa	0
0.5kpa	0
0.5kpa	5
0.5kpa	1
0.5kpa	0
0.5kpa	1
0.5kpa	1
0.5kpa	2
0.5kpa	2
0.5kpa	0
0.5kpa	2
0.5kpa	0
0.5kpa	2
0.5kpa	1
0.5kpa	0
0.5kpa	2
0.5kpa	1
0.5kpa	4
0.5kpa	1
0.5kpa	2
0.5kpa	0
0.5kpa	2
0.5kpa	0
0.5kpa	1
0.5kpa	0
0.5kpa	0
0.5kpa	1
0.5kpa	1
0.5kpa	0
0.5kpa	3
0.5kpa	0
0.5kpa	2
0.5kpa	3
0.5kpa	3
0.5kpa	0
12kpa	4
12kpa	3
12kpa	7
12kpa	22
12kpa	12
12kpa	8
12kpa	26
12kpa	18
12kpa	22
12kpa	17
12kpa	26
12kpa	15
12kpa	10
12kpa	24
12kpa	26
12kpa	10
12kpa	10
12kpa	22
12kpa	4
12kpa	14
12kpa	21
12kpa	10
12kpa	11
12kpa	10
12kpa	12
12kpa	13
12kpa	18
12kpa	18
12kpa	14
12kpa	9
12kpa	13
12kpa	5
12kpa	12
12kpa	9
12kpa	1
12kpa	14
12kpa	9
12kpa	13
12kpa	7
12kpa	14
12kpa	15
12kpa	19
12kpa	10
12kpa	13
12kpa	10
12kpa	22
12kpa	10
12kpa	21
12kpa	9
12kpa	7
12kpa	6
12kpa	19
12kpa	11
12kpa	16
12kpa	13
12kpa	24
12kpa	22
12kpa	24
12kpa	19
12kpa	22
12kpa	4
12kpa	5
12kpa	11
12kpa	16
12kpa	21
12kpa	16
12kpa	16
12kpa	6
12kpa	16
12kpa	12
12kpa	10
12kpa	9
12kpa	15
12kpa	1
12kpa	19
12kpa	11
12kpa	26
12kpa	21
12kpa	27
12kpa	5
12kpa	16
12kpa	11
12kpa	31
12kpa	18
12kpa	8
12kpa	9
12kpa	8
12kpa	13
12kpa	11
12kpa	13
12kpa	3
12kpa	9
12kpa	10
12kpa	14
12kpa	17
12kpa	18
12kpa	10
12kpa	6
12kpa	10
12kpa	16
25kpa	1
25kpa	2
25kpa	1
25kpa	8
25kpa	3
25kpa	6
25kpa	6
25kpa	16
25kpa	1
25kpa	13
25kpa	1
25kpa	3
25kpa	8
25kpa	1
25kpa	27
25kpa	8
25kpa	10
25kpa	8
25kpa	1
25kpa	4
25kpa	0
25kpa	10
25kpa	0
25kpa	3
25kpa	0
25kpa	3
25kpa	4
25kpa	1
25kpa	3
25kpa	14
25kpa	6
25kpa	5
25kpa	6
25kpa	6
25kpa	13
25kpa	1
25kpa	25
25kpa	5
25kpa	6
25kpa	8
25kpa	6
25kpa	4
25kpa	6
25kpa	4
25kpa	4
25kpa	3
25kpa	9
25kpa	10
25kpa	5
25kpa	3
25kpa	12
25kpa	6
25kpa	10
25kpa	5
25kpa	4
25kpa	5
25kpa	10
glass	5
glass	4
glass	40
glass	12
glass	16
glass	9
glass	8
glass	22
glass	12
glass	5
glass	9
glass	5
glass	3
glass	7
glass	7
glass	1
glass	5
glass	9
glass	8
glass	11
glass	11
glass	6
glass	3
glass	8
glass	14
glass	5
glass	4
glass	5
glass	2
glass	1
glass	9
glass	2
glass	8
glass	1
glass	13
glass	7
glass	13
glass	6
glass	6
glass	11
glass	6
glass	9
glass	28
glass	7
glass	7
glass	11
glass	12
glass	5
glass	38
glass	4
glass	25
glass	15
glass	14
glass	19
glass	5
glass	3
glass	10
glass	7
glass	8
glass	8
glass	8
glass	3
glass	8
glass	9
glass	7
glass	12
glass	12
glass	5
glass	10
glass	5
glass	5
glass	1
glass	4
glass	5
glass	3
glass	3
glass	11
0.5kpa	1
0.5kpa	0
0.5kpa	3
0.5kpa	4
0.5kpa	3
0.5kpa	0
0.5kpa	1
0.5kpa	5
0.5kpa	8
0.5kpa	1
0.5kpa	3
0.5kpa	1
0.5kpa	1
0.5kpa	0
0.5kpa	1
0.5kpa	1
0.5kpa	1
0.5kpa	1
0.5kpa	2
0.5kpa	0
0.5kpa	0
0.5kpa	0
0.5kpa	0
0.5kpa	3
0.5kpa	4
0.5kpa	1
0.5kpa	1
0.5kpa	3
0.5kpa	2
0.5kpa	2
0.5kpa	3
0.5kpa	3
0.5kpa	3
0.5kpa	6
0.5kpa	1
0.5kpa	2
0.5kpa	1
0.5kpa	5
0.5kpa	0
0.5kpa	6
0.5kpa	6
0.5kpa	1
0.5kpa	0
0.5kpa	3
0.5kpa	0
0.5kpa	0
0.5kpa	2
0.5kpa	6
0.5kpa	4
0.5kpa	2
0.5kpa	6
0.5kpa	1
0.5kpa	2
0.5kpa	9
0.5kpa	1
0.5kpa	0
0.5kpa	3
0.5kpa	5
0.5kpa	0
0.5kpa	0
0.5kpa	0
0.5kpa	0
0.5kpa	3
0.5kpa	0
0.5kpa	0
0.5kpa	0
12kpa	1
12kpa	16
12kpa	0
12kpa	15
12kpa	5
12kpa	11
12kpa	3
12kpa	11
12kpa	18
12kpa	8
12kpa	10
12kpa	5
12kpa	4
12kpa	3
12kpa	1
12kpa	14
12kpa	5
12kpa	2
12kpa	3
12kpa	9
12kpa	1
12kpa	5
12kpa	4
12kpa	4
12kpa	7
12kpa	8
12kpa	2
12kpa	3
12kpa	0
12kpa	3
12kpa	11
12kpa	5
12kpa	11
12kpa	8
12kpa	7
12kpa	5
12kpa	7
12kpa	10
12kpa	5
12kpa	9
12kpa	8
12kpa	4
12kpa	4
12kpa	3
12kpa	11
12kpa	17
12kpa	11
12kpa	10
12kpa	14
12kpa	7
12kpa	1
12kpa	4
12kpa	5
12kpa	3
12kpa	7
12kpa	0
12kpa	14
12kpa	18
12kpa	9
12kpa	13
12kpa	11
25kpa	5
25kpa	2
25kpa	4
25kpa	4
25kpa	4
25kpa	1
25kpa	10
25kpa	12
25kpa	6
25kpa	8
25kpa	6
25kpa	3
25kpa	8
25kpa	8
25kpa	10
25kpa	2
25kpa	5
25kpa	5
25kpa	12
25kpa	7
25kpa	5
25kpa	1
25kpa	6
25kpa	2
25kpa	4
25kpa	2
25kpa	5
25kpa	1
25kpa	6
25kpa	18
25kpa	9
25kpa	4
25kpa	21
25kpa	9
25kpa	3
25kpa	7
25kpa	13
25kpa	14
25kpa	11
25kpa	10
25kpa	3
25kpa	4
25kpa	3
25kpa	5
25kpa	5
25kpa	2
25kpa	7
25kpa	15
25kpa	8
25kpa	8
25kpa	2
25kpa	6
25kpa	12
25kpa	7
25kpa	14
25kpa	13
25kpa	7
25kpa	13
glass	6
glass	4
glass	3
glass	3
glass	2
glass	2
glass	2
glass	0
glass	2
glass	1
glass	4
glass	4
glass	10
glass	8
glass	8
glass	7
glass	2
glass	6
glass	5
glass	3
glass	4
glass	6
glass	0
glass	18
glass	3
glass	1
glass	2
glass	6
glass	5
glass	10
glass	8
glass	9
glass	2
glass	3
glass	12
glass	2
glass	7
glass	6
glass	5
glass	3
glass	6
glass	3
glass	6
glass	1
glass	14
glass	6
glass	2
glass	5
glass	2
glass	1
glass	3
glass	4
glass	2
glass	2
glass	2
glass	2
glass	9
glass	3
glass	9
glass	2
glass	5
glass	2
glass	2
glass	0
glass	1
glass	5
glass	2
glass	0
glass	3
glass	3
glass	2
glass	5
glass	5
glass	5
glass	3
glass	1
glass	3
glass	1
glass	7
glass	8
glass	4
glass	10
glass	3
glass	7
glass	5
glass	3
glass	3
glass	8
glass	1
glass	9
glass	3
glass	0
glass	6
glass	0
glass	3
glass	2
glass	12
glass	3
glass	4
glass	7
glass	7
glass	12
glass	3
glass	10
glass	7
glass	0
glass	1
